# Supplementary material for: Chalcone synthase (CHS) family members analysis from eggplant (Solanum melongena L.) in the flavonoid biosynthetic pathway and expression patterns in response to heat stress
Source: PubMed Central journal article supplement (PMC7164647; doi:10.1371/journal.pone.0226537), 2020-04-17
Supplement: pone.0226537.s007.pdf [file pone.0226537.s007.pdf]

# PLOS ONE

## Chalcone synthase (CHS) family members analysis from eggplant (*Solanum melongena* L.) in the flavonoid biosynthetic pathway and expression patterns in response to heat stress

--Manuscript Draft--

|                               |                                                                                                                                                                                                                                                                                                                                                                                                                                                                                                                                                                                                                                                                                                                                                                                                                                                                                                                                                                                                                                                                                                                                                                                                                                                                                                                                                                                                                                                                                                                                                                                                                                                                                                                                                                                                                                                                                                                |
|-------------------------------|----------------------------------------------------------------------------------------------------------------------------------------------------------------------------------------------------------------------------------------------------------------------------------------------------------------------------------------------------------------------------------------------------------------------------------------------------------------------------------------------------------------------------------------------------------------------------------------------------------------------------------------------------------------------------------------------------------------------------------------------------------------------------------------------------------------------------------------------------------------------------------------------------------------------------------------------------------------------------------------------------------------------------------------------------------------------------------------------------------------------------------------------------------------------------------------------------------------------------------------------------------------------------------------------------------------------------------------------------------------------------------------------------------------------------------------------------------------------------------------------------------------------------------------------------------------------------------------------------------------------------------------------------------------------------------------------------------------------------------------------------------------------------------------------------------------------------------------------------------------------------------------------------------------|
| <b>Manuscript Number:</b>     | PONE-D-19-33168R1                                                                                                                                                                                                                                                                                                                                                                                                                                                                                                                                                                                                                                                                                                                                                                                                                                                                                                                                                                                                                                                                                                                                                                                                                                                                                                                                                                                                                                                                                                                                                                                                                                                                                                                                                                                                                                                                                              |
| <b>Article Type:</b>          | Research Article                                                                                                                                                                                                                                                                                                                                                                                                                                                                                                                                                                                                                                                                                                                                                                                                                                                                                                                                                                                                                                                                                                                                                                                                                                                                                                                                                                                                                                                                                                                                                                                                                                                                                                                                                                                                                                                                                               |
| <b>Full Title:</b>            | Chalcone synthase (CHS) family members analysis from eggplant ( <i>Solanum melongena</i> L.) in the flavonoid biosynthetic pathway and expression patterns in response to heat stress                                                                                                                                                                                                                                                                                                                                                                                                                                                                                                                                                                                                                                                                                                                                                                                                                                                                                                                                                                                                                                                                                                                                                                                                                                                                                                                                                                                                                                                                                                                                                                                                                                                                                                                          |
| <b>Short Title:</b>           | CHS family analysis from eggplant in flavonoid biosynthetic pathway under heatstress                                                                                                                                                                                                                                                                                                                                                                                                                                                                                                                                                                                                                                                                                                                                                                                                                                                                                                                                                                                                                                                                                                                                                                                                                                                                                                                                                                                                                                                                                                                                                                                                                                                                                                                                                                                                                           |
| <b>Corresponding Author:</b>  | Xuexia Wu, Ph.D.<br>Shanghai Academy of Agriculture Sciences<br>Shanghai, CHINA                                                                                                                                                                                                                                                                                                                                                                                                                                                                                                                                                                                                                                                                                                                                                                                                                                                                                                                                                                                                                                                                                                                                                                                                                                                                                                                                                                                                                                                                                                                                                                                                                                                                                                                                                                                                                                |
| <b>Keywords:</b>              | CHS family members; eggplant; anthocyanin biosynthesis; heat stress                                                                                                                                                                                                                                                                                                                                                                                                                                                                                                                                                                                                                                                                                                                                                                                                                                                                                                                                                                                                                                                                                                                                                                                                                                                                                                                                                                                                                                                                                                                                                                                                                                                                                                                                                                                                                                            |
| <b>Abstract:</b>              | <p>Enzymes of the chalcone synthase (CHS) family participate in the synthesis of multiple secondary metabolites in plants, fungi and bacteria. CHS showed a significant correlation with the accumulation patterns of anthocyanin. The peel color, which is primarily determined by the content of anthocyanin, is an economically important trait for eggplants that is affected by heat stress. A total of 7 CHS ( SmCHS1-7 ) putative genes were identified in a genome-wide analysis of eggplants ( <i>S. melongena</i> L.). The SmCHS genes were distributed on 7 scaffolds and were classified into 3 clusters. Phylogenetic relationship analysis showed that 73 CHS genes from 7 Solanaceae species were classified into 10 groups. SmCHS5 , SmCHS6 and SmCHS7 were continuously down-regulated under 38 °C and 45 °C treatment, while SmCHS4 was up-regulated under 38 °C but showed little change at 45 °C in peel. Expression profiles of key anthocyanin biosynthesis gene families showed that the PAL, 4CL and AN11 genes were primarily expressed in all five tissues. The CHI, F3H, F3'5'H, DFR, 3GT and bHLH1 genes were expressed in flower and peel. Under heat stress, the expression level of 52 key genes were reduced under heat stress. In contrast, the expression patterns of eight key genes similar to SmCHS4 were up-regulated at 38 °C 3h. Comparative analysis of putative CHS protein biochemical characteristics, cis - regulatory elements, and regulatory networks indicated that SmCHS gene family has a conserved gene structure and functional diversification. SmCHS showed two or more expression patterns and performed multiple functions to regulate anthocyanin content. Combined with analysis of regulatory networks, to the results of this study may facilitate further research to understand the regulatory mechanism governing peel color in eggplants.</p> |
| <b>Order of Authors:</b>      | <p>Xuexia Wu, Ph.D.</p> <p>Shengmei Zhang</p> <p>Xiaohui Liu</p> <p>Jing Shang</p> <p>Aidong Zhang</p> <p>Zongwen Zhu</p> <p>Dingshi Zha</p>                                                                                                                                                                                                                                                                                                                                                                                                                                                                                                                                                                                                                                                                                                                                                                                                                                                                                                                                                                                                                                                                                                                                                                                                                                                                                                                                                                                                                                                                                                                                                                                                                                                                                                                                                                   |
| <b>Response to Reviewers:</b> | <p>Dear Reviewers</p> <p>Thank you and anonymous reviewers very much for your kind and useful comments for our manuscript "Genome-wide analysis of chalcone synthase (CHS) family from eggplant (<i>Solanum melongena</i> L.) in flavonoid biosynthetic pathway and expression pattern in response to heat stress" (PONE-D-19-33168). We have read and seriously considered the comments very carefully, checked and revised the manuscript many times. Major revisions throughout the revised manuscript have been made as followings.</p>                                                                                                                                                                                                                                                                                                                                                                                                                                                                                                                                                                                                                                                                                                                                                                                                                                                                                                                                                                                                                                                                                                                                                                                                                                                                                                                                                                    |

1. The title name have been changed to “Chalcone synthase (CHS) family analysis from eggplant (*Solanum melongena* L.) in flavonoid biosynthetic pathway and expression pattern in response to heat stress”
2. The ‘Introduction’ section has been modified according to the comments
3. The results of all 73 CHS proteins sequence alignment, conserved residues and sequence diversity were analyzed.
4. We corrected some other grammatical errors and words spelling mistakes.

The followings are responses to the comments point-by-point.

Review Comments to the Author

Reviewer #1: In this manuscript entitled ‘Genome-wide analysis of chalcone synthase (CHS) family from eggplant (*Solanum melongena* L.) in flavonoid biosynthetic pathway and expression pattern in response to heat stress’ the authors have identified CHS-encoding genes of eggplant, performed their *in silico* characterization and analysed the expression pattern of key genes associated with anthocyanin biosynthesis pathways. Here are the following comments on the research for the authors:

1. The manuscript need to be revised for its English, grammar and flow of information. For example in L130: ‘The profiles of CHS (PF00195 and PF02797) were downloaded from the Pfam’- wwere need to be corrected to were. Line 198: ‘the other 7 Solanaceae species ranged from 17.3 to 47.4, the length of protein ranged’ kDa need to be added to the molecular weights mentioned here.

Answer: Thank you for pointing out the mistakes in the manuscript. We have corrected these issues in the revised manuscript according to comments, and checked the manuscript many times. Please refer to line 163 in revised manuscript with track changes.

2. It would be more informative for the readers if authors will provide a comparative mapping of CHS genes in the genome of other related plants where sequence information are available.

Answer: Chromosomal location of CHS genes were added in Table S1. Sequence alignment of all 73 CHS proteins of *Solanum* specie showed in the Fig S1. The VIII, IX and X groups are distinguished from other groups mainly depends on the position 1-164 amino acids, Groups I, II and III are relatively conservative at the position 260-360 amino acids, in which the other groups are very diverse(S1 Fig). Please refer to line 325-328.

3. Fig. 7. represents key anthocyanin biosynthesis gene expression profiles in response to heat stress. A bar diagram with proper error bars for individual gene will be the most appropriate way for presentation of this result. The authors are advised to prepare the same for readers convenient.

Answer: Thanks for your suggestion. Error bars have been added in the Fig7.

4. Authors have performed the phylogenetic classification of CHS gene in Solanaceae and found that 73 CHS genes have classified into 10 groups. However, it has not been mentioned or discussed that on what basis the CHS are classified and how one group differs with the others.

Answer: The results of all 73 CHS proteins sequence alignment were added in S1 Fig. Conserved residues and sequence diversity of 73 CHS proteins were analyzed. Please refer to line 240-244 and 325-328

5. As authors have mentioned in the text about some of the *cis* regulatory element present on all the SmCHS promoter, similarly they should mention the unique *cis* element for each SmCHS genes. Not all CHS genes had shown similar expression pattern, thus a probable correlation of *cis* regulatory element on promoter and expression pattern of the gene should be mentioned in the discussion.

Answer: I'm sorry we miss the point. We have added this to the ‘result’ section refer to line 303-307.

Reviewer #2: The manuscript entitled “Genome-wide analysis of chalcone synthase (CHS) family from eggplant (*Solanum melongena* L.) in flavonoid biosynthetic pathway and expression pattern in response to heat stress” by Wu et al. reports the *in silico* analysis of chalcone synthase (CHS) gene family in eggplant. In brief, the current manuscript presents biochemical characteristics, phylogenetic relationships, gene

structures, cis-regulatory elements, regulatory network and functional predictions of the CHS gene family members.

The current quality of the manuscript leaves a number of questions to be answered, which are outlined below. The exposition of the results and its discussion in the manuscript needs a major revision including careful English usage and style edition.

1. The manuscript title starts with 'Genome-wide analysis'; however, most of the analysis has been performed on CHS proteins. The work performed in the manuscript does not justify the title.

Answer: We changed the manuscript title as to 'Chalcone synthase (CHS) family members analysis from eggplant (*Solanum melongena* L.) in the flavonoid biosynthetic pathway and expression patterns in response to heat stress'.

2. The 'Introduction' section of the manuscript is not coherent. Also, it does not describe the relevance of studying CHS gene family in proper manner.

Answer: We have added more information about CHS involve in synthesis of flavonoid compounds during heat stress defense. Please refer to line 70-80.

3. One of the major concerns is, authors have given RNA-Seq data in the result section. However, the source of this data is not described in the "Material and Method" section.

Answer: The overview of RNA-seq result from our lab was published (Zhang S et al, BMC Plant Biol. 2019 (1): 1-13). We therefore added a brief description of data source about RNA-seq in the "Material and Method" section. Please refer to line 196-198.

4. Also, authors have not provided the proper statistics of the validation experiment. Statistical analysis should be done to evaluate the significance of qRT-PCR data. It is recommended to include statistical analysis in the 'Materials and methods' section.

Answer: we have added the statistical analysis information of qRT-PCR in the 'Materials and methods' section. Please refer to line 223-225.

5. Writing in Subheadings 4 to 7 under the 'Results' section is very technical. The data is not described properly. Authors have chosen to explain the dataset in the 'Discussion' section. The outcome of the experiments should be described in the 'Results' section and interpretation in consistence with the previous studies should be given in the 'Discussion' section.

Answer: We agree and have revised the 'results' and 'discussion' accordingly. Please refer to line 351-361.

6. In Figure 3A, the abundance of cis-elements is given in all the CHS genes in eggplant. How the regulation of all the genes can be shown together?

Answer: We changed the histogram of figure 3A into a table to help readers understand the results.

7. In Figure 5, there is no downregulation value. How the data has been calculated? What control has been taken and how the data has been normalized?

Answer: Some errors have been corrected in line 351 of manuscript. Three SmCHS genes (SmCHS1, SmCHS2, and SmCHS3) were continuously downregulated under 38 °C and 45 °C treatment compared with the CK (27 °C). Gene expression level was estimated by RNA-seq from mean FPKM (fragments per kilobase of exon model per million reads mapped) values for each treatment, and showed the expression patterns in heatmap. Each treatment had three biological replicates.

8. Figure 6, network is not very clear. A clear image has to be provided.

Answer: Is the network image you referred to Figure S2? We're sorry that there are too many genes in the network image. The picture can be expanded up to 6400%, so that the above words can be read clearly.

9. In 'Material and Method' section, what is CK? Why the samples harvested at 28° C are termed as CK and all the subsequent data is compared to CK?

Answer: The optimum growth temperature for eggplant is between 22 and 30°C. Eggplants subjected to high temperature may exhibit to stagnation of growth, abortion of flower buds, and decrease of pollen viability rate and fruit set, and the peel's color will turn light when the temperature is over 35°C. Therefore, samples of 27 °C were termed as CK.

|  |                                                                                                                                                                                                                                                                                                                                                                                                                                                                                                                                                                                                                                                                                                                                                                                                                                                                                                                                                                                                                                                                                                                                                                                                                                                                                                                                                                                                                                                                                                                                                                                                                                                                                                                                                                                                             |
|--|-------------------------------------------------------------------------------------------------------------------------------------------------------------------------------------------------------------------------------------------------------------------------------------------------------------------------------------------------------------------------------------------------------------------------------------------------------------------------------------------------------------------------------------------------------------------------------------------------------------------------------------------------------------------------------------------------------------------------------------------------------------------------------------------------------------------------------------------------------------------------------------------------------------------------------------------------------------------------------------------------------------------------------------------------------------------------------------------------------------------------------------------------------------------------------------------------------------------------------------------------------------------------------------------------------------------------------------------------------------------------------------------------------------------------------------------------------------------------------------------------------------------------------------------------------------------------------------------------------------------------------------------------------------------------------------------------------------------------------------------------------------------------------------------------------------|
|  | <p>10. In Figure 7, all the genes are showing high expression at 3 h CK. Do authors have any explanation of these results? Also, this data has been recorded from which tissue?<br/>         Answer: Under heat stress, SmCHS4 and some anthocyanin biosynthesis related genes show different expression profiles at 38 °C-3h. These results suggest that these co-up-regulated genes contribute to protect the eggplant at beginning of heat stress defense. These data were recorded from the eggplant peels, which is indicated in the Figure 5 and Figure 6.</p> <p>11. The other major issue is that this manuscript requires a thorough language editing since there are numerous grammatical errors including dropped articles, split infinitives, improper word usage etc. It is advisable that the manuscript must be edited by an English-speaking personal.<br/>         Answer: We checked and revised the manuscript many times. Some grammatical errors and words spelling mistakes have been modified by English editing company of American Journal Experts (AJE).</p> <p>12. Reference section has to be rechecked. For example, in few places journal name is abbreviated (J Exp Bot) and in few places it is not (Plant physiology). In few references, journal name is capitalized and in others it is not.<br/>         Answer: This issue has been corrected.</p> <p>13. Biochemical analysis of CHS proteins (pI, molecular weight etc.) is not relevant to the manuscript. This data can be removed from the draft.<br/>         Overall, the manuscript is not of adequate quality. The manuscript should be revised thoroughly for data presentation, result interpretation, description and language.<br/>         Answer: Biochemical analysis of CHS proteins was removed.</p> |
|--|-------------------------------------------------------------------------------------------------------------------------------------------------------------------------------------------------------------------------------------------------------------------------------------------------------------------------------------------------------------------------------------------------------------------------------------------------------------------------------------------------------------------------------------------------------------------------------------------------------------------------------------------------------------------------------------------------------------------------------------------------------------------------------------------------------------------------------------------------------------------------------------------------------------------------------------------------------------------------------------------------------------------------------------------------------------------------------------------------------------------------------------------------------------------------------------------------------------------------------------------------------------------------------------------------------------------------------------------------------------------------------------------------------------------------------------------------------------------------------------------------------------------------------------------------------------------------------------------------------------------------------------------------------------------------------------------------------------------------------------------------------------------------------------------------------------|

**Additional Information:**

| Question | Response |
|----------|----------|
|----------|----------|

|                                                                                                                                                                                                                                                                                                                                                                                                                                                                                                     |                                       |
|-----------------------------------------------------------------------------------------------------------------------------------------------------------------------------------------------------------------------------------------------------------------------------------------------------------------------------------------------------------------------------------------------------------------------------------------------------------------------------------------------------|---------------------------------------|
| <p><b>Financial Disclosure</b></p> <p>Enter a financial disclosure statement that describes the sources of funding for the work included in this submission. Review the <a href="#">submission guidelines</a> for detailed requirements. View published research articles from <a href="#">PLOS ONE</a> for specific examples.</p> <p>This statement is required for submission and <b>will appear in the published article</b> if the submission is accepted. Please make sure it is accurate.</p> | <p>YES-Specify the role(s) played</p> |
|-----------------------------------------------------------------------------------------------------------------------------------------------------------------------------------------------------------------------------------------------------------------------------------------------------------------------------------------------------------------------------------------------------------------------------------------------------------------------------------------------------|---------------------------------------|

**Unfunded studies**

Enter: *The author(s) received no specific funding for this work.*

**Funded studies**

Enter a statement with the following details:

- Initials of the authors who received each award
- Grant numbers awarded to each author
- The full name of each funder
- URL of each funder website
- Did the sponsors or funders play any role in the study design, data collection and analysis, decision to publish, or preparation of the manuscript?
- **NO** - Include this sentence at the end of your statement: *The funders had no role in study design, data collection and analysis, decision to publish, or preparation of the manuscript.*
- **YES** - Specify the role(s) played.

\* typeset

**Competing Interests**

Use the instructions below to enter a competing interest statement for this submission. On behalf of all authors, disclose any [competing interests](#) that could be perceived to bias this work—acknowledging all financial support and any other relevant financial or non-financial competing interests.

This statement **will appear in the published article** if the submission is accepted. Please make sure it is accurate. View published research articles from [PLOS ONE](#) for specific examples.

I have read the journal's policy and the authors of this manuscript have the following competing interests

**NO authors have competing interests**

Enter: *The authors have declared that no competing interests exist.*

**Authors with competing interests**

Enter competing interest details beginning with this statement:

*I have read the journal's policy and the authors of this manuscript have the following competing interests: [insert competing interests here]*

\* typeset

**Ethics Statement**

N/A

Enter an ethics statement for this submission. This statement is required if the study involved:

- Human participants
- Human specimens or tissue
- Vertebrate animals or cephalopods
- Vertebrate embryos or tissues
- Field research

Write "N/A" if the submission does not require an ethics statement.

General guidance is provided below. Consult the [submission guidelines](#) for detailed instructions. **Make sure that all information entered here is included in the Methods section of the manuscript.**

## Format for specific study types

### Human Subject Research (involving human participants and/or tissue)

- Give the name of the institutional review board or ethics committee that approved the study
- Include the approval number and/or a statement indicating approval of this research
- Indicate the form of consent obtained (written/oral) or the reason that consent was not obtained (e.g. the data were analyzed anonymously)

### Animal Research (involving vertebrate animals, embryos or tissues)

- Provide the name of the Institutional Animal Care and Use Committee (IACUC) or other relevant ethics board that reviewed the study protocol, and indicate whether they approved this research or granted a formal waiver of ethical approval
- Include an approval number if one was obtained
- If the study involved *non-human primates*, add *additional details* about animal welfare and steps taken to ameliorate suffering
- If anesthesia, euthanasia, or any kind of animal sacrifice is part of the study, include briefly which substances and/or methods were applied

### Field Research

Include the following details if this study involves the collection of plant, animal, or other materials from a natural setting:

- Field permit number
- Name of the institution or relevant body that granted permission

### Data Availability

Authors are required to make all data underlying the findings described fully available, without restriction, and from the time of publication. PLOS allows rare exceptions to address legal and ethical concerns. See the [PLOS Data Policy](#) and [FAQ](#) for detailed information.

Yes - all data are fully available without restriction

A Data Availability Statement describing where the data can be found is required at submission. Your answers to this question constitute the Data Availability Statement and **will be published in the article**, if accepted.

**Important:** Stating 'data available on request from the author' is not sufficient. If your data are only available upon request, select 'No' for the first question and explain your exceptional situation in the text box.

Do the authors confirm that all data underlying the findings described in their manuscript are fully available without restriction?

**Describe where the data may be found in full sentences. If you are copying our sample text, replace any instances of XXX with the appropriate details.**

- If the data are **held or will be held in a public repository**, include URLs, accession numbers or DOIs. If this information will only be available after acceptance, indicate this by ticking the box below. For example: *All XXX files are available from the XXX database (accession number(s) XXX, XXX).*
- If the data are all contained **within the manuscript and/or Supporting Information files**, enter the following: *All relevant data are within the manuscript and its Supporting Information files.*
- If neither of these applies but you are able to provide **details of access elsewhere**, with or without limitations, please do so. For example:

*Data cannot be shared publicly because of [XXX]. Data are available from the XXX Institutional Data Access / Ethics Committee (contact via XXX) for researchers who meet the criteria for access to confidential data.*

*The data underlying the results presented in the study are available from (include the name of the third party*

All relevant data are within the manuscript and its Supporting Information files.



|                                                                                                                                                                                                                                         |  |
|-----------------------------------------------------------------------------------------------------------------------------------------------------------------------------------------------------------------------------------------|--|
| <p><i>and contact information or URL).</i></p> <ul style="list-style-type: none"><li>• This text is appropriate if the data are owned by a third party and authors do not have permission to share the data.</li></ul> <p>* typeset</p> |  |
| Additional data availability information:                                                                                                                                                                                               |  |

1 **Chalcone synthase (CHS) family members analysis from**  
2 **eggplant (*Solanum melongena* L.) in the flavonoid**  
3 **biosynthetic pathway and expression patterns in response to**  
4 **heat stress**

5

6 **Xuexia Wu<sup>¶</sup>, Shengmei Zhang<sup>¶</sup>, Xiaohui Liu, Jing Shang, Aidong Zhang, Zongwen**  
7 **Zhu, Dingshi Zha\***

8

9 Horticultural Research Institute, Shanghai Academy of Agricultural Sciences, Shanghai  
10 Key Laboratory of Protected Horticultural Technology, Shanghai, 201403, China \*

11 Corresponding author: Dingshi Zha

12 E-mail: dingshizha1966@126.com

13

14 <sup>¶</sup> These authors contributed equally to this work.

15

## 16 Abstract

17 Enzymes of the chalcone synthase (CHS) family participate in the synthesis of multiple  
18 secondary metabolites in plants, fungi and bacteria. CHS showed a significant  
19 correlation with the accumulation patterns of anthocyanin. The peel color, which  
20 is primarily determined by the content of anthocyanin, is an economically important trait  
21 for eggplants that is affected by heat stress. A total of 7 *CHS* (*SmCHS1-7*) putative  
22 genes were identified in a genome-wide analysis of eggplants (*S. melongena* L.). The  
23 *SmCHS* genes were distributed on 7 scaffolds and were classified into 3 clusters.  
24 Phylogenetic relationship analysis showed that 73 *CHS* genes from 7 Solanaceae  
25 species were classified into 10 groups. *SmCHS5*, *SmCHS6* and *SmCHS7* were  
26 continuously down-regulated under 38 °C and 45 °C treatment, while *SmCHS4* was up-  
27 regulated under 38 °C but showed little change at 45 °C in peel. Expression profiles of  
28 key anthocyanin biosynthesis gene families showed that the PAL, 4CL and AN11 genes  
29 were primarily expressed in all five tissues. The CHI, F3H, F3'5'H, DFR, 3GT and  
30 bHLH1 genes were expressed in flower and peel. Under heat stress, the expression level  
31 of 52 key genes were reduced under heat stress. In contrast, the expression patterns of  
32 eight key genes similar to *SmCHS4* were up-regulated at 38 °C 3h. Comparative analysis  
33 of putative CHS protein biochemical characteristics, cis-regulatory elements, and  
34 regulatory networks indicated that *SmCHS* gene family has a conserved gene structure  
35 and functional diversification. *SmCHS* showed two or more expression patterns and  
36 performed multiple functions to regulate anthocyanin content. Combined with analysis  
37 of regulatory networks, to the results of this study may facilitate further research to  
38 understand the regulatory mechanism governing peel color in eggplants.

39

## 40 Introduction

41 Eggplant (*S. melongena* L.) is one of the most important thermophilic vegetables  
42 produced in many tropical and temperate regions around the world. The optimum  
43 growth temperature for eggplant is between 22 and 30 °C. Eggplants subjected to high  
44 temperature may exhibit to stagnation of growth, abortion of flower buds, and decrease

45 of pollen viability rate and fruit set, and the peel's color will turn light when the  
46 temperature is over 35 °C. High temperature severely reduces the yield and affects the  
47 appearance quality of eggplant. However, the molecular mechanism governing high  
48 temperature stress in eggplants has not been thoroughly elucidated.

49  
50 Anthocyanins are plant secondary metabolites and are among the most abundant natural  
51 pigments, that are responsible for the characteristic colors in flowers, fruits and  
52 vegetables plant tissues. The anthocyanin biosynthesis pathway has been studied in  
53 numerous plant species and most of the genes involved in this process have been  
54 identified. Moreover, anthocyanins play an important role in plant survival under  
55 stressful environmental conditions. High temperatures are known to reduce  
56 anthocyanin accumulation and have discoloration effects in many plant tissues, causing  
57 drastic effects in colored flowers [1, 2], and affecting the skin of such fruits as grape  
58 berries, apples and eggplant [3-7].

59  
60 It is well known that CHS is the gatekeeper of the anthocyanin pathway [8]. Enzymes  
61 of chalcone synthase (CHS) are member of the plants-specific type III polyketide  
62 synthase (PKS) [9, 10], family and catalyze the first committed step of the branch of  
63 the phenylpropanoid pathway, which leads to the synthesis of flavonoids [11, 12].  
64 Flavonoids are well known as a group of plant secondary metabolites that comprise  
65 several different classes of compounds, such as chalcones, flavones, flavonol  
66 isoflavones and anthocyanins. Flavonoids have a wide variety of biological functions  
67 in, for instance, flower pigmentation, protection against UV radiation, pathogen defense,  
68 auxin transport and pollen fertility [13-15]. CHS also showed a significant correlation  
69 with synthesis of flavonoid compounds during heat stress defense. In bread wheat, heat  
70 stress responsive element has been found in the promoter of *Chs-D1* gene [16]. High-  
71 temperature stress had a large impact on the expression of *CHS7*, *CHS8* in both seeds  
72 and pods of Soybean [17]. The transcript levels of *CHS* decreased in apple peel and  
73 rose flower after heat treatment [1, 4]. In cork oak, *CHS* gene expression exhibited  
74 an increase under 45 °C, but showed a decreased expression at 55 °C [18]. The

75 emergence of **CHSV and CHSVII** is important for the development of fungal heat stress  
76 tolerance and pathogenicity in pathogenic fungi. [19]. In addition, *CHS*  
77 (Sme2.5\_00283.1\_g00002.1) was up-regulated, and the other two *CHS* gene members  
78 were down-regulated under heat stress in peel of eggplant [7].

79

80 The product of the CHS reaction is a pivotal precursor for a large array of secondary  
81 metabolites derived from malonyl-CoA and p-coumaroyl-CoA. CHS exists as  
82 homodimeric iterative PKS (monomer size of 42-45 kDa) with two independent active  
83 sites that catalyze a series of decarboxylation, condensation, and cyclization reactions  
84 [10, 20]. Member of the CHS superfamily share high similarity in their amino acid  
85 sequence, which contains the structurally conserved catalytic center consisting of four  
86 residues, Cys-His-Asn-Phe, and most of the genes contain two exons and one intron  
87 [21]. However, the *CHS* gene family has not been characterized in eggplants to date.

88

89 In the current study, all *SmCHS* family members were identified in eggplant. A  
90 comprehensive analysis of members was performed, including gene structures, the  
91 biochemical characteristics of putative CHS protein, promoter *cis*-elements,  
92 phylogenetic relationships among members in other relative species, and their  
93 expression profiles in various organs/tissues under high temperature stress. The  
94 findings of the present study may facilitate functional studies on eggplant *SmCHS*  
95 family genes.

96

## 97 **Materials and methods**

### 98 **Plant materials and RNA extraction**

99 The eggplant cultivar ‘Tewangda’ is a cold-tolerant cultivar with blackish purple skin.  
100 This cultivar grows vigorously and has good fruit setting. The **fruit shape has** a 27.6 cm  
101 fruit length, a 5.4 cm transverse diameter and a 209 g single fruit weight on average.

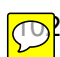

**The ‘Tewangda’ fruit has good commercial properties and good transportation**  
103 **resistance.** ‘Tewangda’ fruits were grown at the same growth stage and were randomly

104 selected. These plants were grown 144 days after sowing, and then placed inside  
105 incubators set at 27 °C (CK), 38 °C or 45 °C for 3 or 6 h (three plants per treatment). For  
106 each treatment, the tissue samples of root, stem, leaf, flower and peel were obtained  
107 and immediately frozen in liquid nitrogen and stored at -80 °C for RNA extraction and  
108 other analyses. All plant materials examined in this study were obtained from Shanghai  
109 Academy of Agricultural Sciences. Total RNA was extracted from each tissue sample  
110 using the mirVana miRNA Isolation Kit (Ambion) following the manufacturer's  
111 protocol. The extracted total RNA was stored at -80 °C. RNA integrity was evaluated  
112 using the Agilent 2100 Bioanalyzer (Agilent Technologies, Santa Clara, CA, USA).

113

## 114 **Identification of the CHS family members in the eggplant** 115 **genome**

116 The whole protein sequence of *Solanum melongena* L. (eggplant) were obtained from  
117 the Eggplant Genome DataBase (<http://eggplant.kazusa.or.jp>) [22], and those of  
118 *Solanum tuberosum* L. (potato,  
119 [http://solanaceae.plantbiology.msu.edu/pgsc\\_download.shtml](http://solanaceae.plantbiology.msu.edu/pgsc_download.shtml)) [23], *Solanum*  
120 *lycopersicum* (tomato,  
121 [https://solgenomics.net/organism/Solanum\\_lycopersicum/genome](https://solgenomics.net/organism/Solanum_lycopersicum/genome)) [24], *Solanum*  
122 *penellii* (wild tomato, [https://www.plabipd.de/project\\_spenn/start.ep](https://www.plabipd.de/project_spenn/start.ep)) [25], *Capsicum*  
123 *annuum* L. (pepper, <http://peppergenome.snu.ac.kr>) [26], *Petunia axillaris*  
124 ([https://solgenomics.net/organism/Petunia\\_axillaris/genome](https://solgenomics.net/organism/Petunia_axillaris/genome)) [27], *Petunia inflata*  
125 ([https://solgenomics.net/organism/Petunia\\_inflata/genome](https://solgenomics.net/organism/Petunia_inflata/genome)) [27], and *Nicotiana*  
126 *tabacum* (common tobacco, <https://www.ncbi.nlm.nih.gov/nuccore/AYMY000000000>)  
127 [28]. The profiles of CHS (PF00195 and PF02797) were downloaded from the Pfam  
128 protein family database (<http://pfam.xfam.org/>), and these profile sequences were used  
129 as queries to perform BLASTP searches against the protein sequence data of all the  
130 species mentioned above with a maximum E-value of  $1 \times 10^{-3}$ , respectively [29]. To  
131 further verify the exact copy number of CHS and remove redundant sequences, the  
132 Pfam database and Genome websites were also searched using “chalcone synthase” as

133 keywords. All CHS sequences were submitted to EXPASy  
134 (<https://web.expasy.org/protparam/>) to calculate the number of amino acids, molecular  
135 weights and theoretical isoelectric points (pI).

136

## 137 **Structural characterization**

138 The locations and intron numbers of CHS were acquired through the genome website.  
139 All of the acquired protein sequences were first aligned by ClustalX software with the  
140 default parameters [30]. An unrooted maximum-likelihood phylogenetic tree was  
141 constructed using MEGA6 software with a  bootstrap test of 1000 times [31]. The  
142 MEME program (Version 5.0.5, <http://meme-suite.org/tools/meme>) was used to  
143 identify the conserved motif of the CHS sequences with the following parameters: any  
144 number of repetitions, maximum of 10 misfits and optimum motif width of 6-200 amino  
145 acid residues. The WoLF PSORT program was used to predict the subcellular  
146 localization information of CHS proteins (<https://www.genscript.com/wolf-psort.html>)  
147 [32].

148

## 149 **Analysis of *cis*-acting elements in SmCHS**

150 The upstream sequences (2 kb) of the *SmCHS* coding sequences in eggplant were  
151 retrieved from the genome sequence and then submitted to PlantCARE  
152 (<http://bioinformatics.psb.ugent.be/webtools/plantcare/html/>) to identify regulatory  
153 elements [33].

154

## 155 **Phylogenetic analysis of CHS genes**

156 The full-length protein sequences of all eight species in Solanaceae were used for  
157 phylogenetic analysis. All of the protein sequences were first aligned by ClustalX  
158 software with the default parameters [30]. The phylogenetic tree was generated with  
159 MEGA6 software with a bootstrap test of 1000 times. The final tree was viewed and  
160 modified in Evolview software [34]. The CHS genes were classified into different  
161 groups according to the topology of the phylogenetic tree.

162

## 163 **Expression analysis of anthocyanin biosynthetic genes and** 164 **construction of the mRNA regulatory network**

165 The RNA-seq results were obtained by our lab [35]. Gene expression level was  
166 estimated from mean FPKM (fragments per kilobase of exon model per million reads  
167 mapped) values for each treatment, and showed the expression patterns in  
168 heatmap. Significant differentially expressed genes (fold change  $\geq 2$  and  $p$ -value  $\leq 0.05$ )  
169 were used to calculate the Pearson correlation coefficient between *CHS* genes and other  
170 genes. The TBtools program was used to elucidate the Gene Ontology (GO) functional  
171 classification for the mRNAs with correlation coefficients greater than 0.9 [36]. The  
172 top 5 regulatory mRNAs annotated by GO enrichment for the genes associated with  
173 anthocyanin biosynthesis were collected to construct the regulatory network. The  
174 network was visualized using Cytoscape [37].

175

## 176 **qRT-PCR analysis**

177 Expression level of anthocyanin biosynthesis genes, including phenylalanine ammonia  
178 lyase (PAL), cinnamate 4-hydroxylase (C4H), 4-coumarateCoA ligase (4CL), CHS,  
179 chalcone isomerase (CHI), flavanone 3-hydroxylase (F3H), flavonoid 3'-hydroxylase  
180 (F3'H), flavonoid 3'5'-hydroxylase (F3'5'H), dihydroflavonol4-reductase (DFR),  
181 anthocyanidin synthase (ANS), anthocyanidin 3-O-glucosyltransferase (3GT),  
182 Anthocyanins11 (AN11), and most transcription factors, such as myeloblastosis (MYB),  
183 basic helix-loop-helix (bHLH) and metadata authority description schema(MADS1),  
184 were analyzed. First-strand cDNA was synthesized from g from 5 tissues (root, stem,  
185 leaf, flower and peel) using a Prime Script RT Reagent Kit (Takara, Dalian, China). The  
186 qRT-PCR reactions were performed in 96-well plates using the ABI 7500 fast Real-  
187 Time PCR system (Applied Biosystems, USA) with the QuantiFast SYBR Green PCR  
188 Kit (Qiagen, Duesseldorf, Germany). The qRT-PCR parameters were as follows: 95 °C  
189 for 5 min, then 45 cycles of 95 °C for 10 s, 60 °C for 10 s, and 72 °C for 10 s. The relative  
190 mRNA expression levels were calculated using the  $2^{-\Delta\Delta CT}$  method [38]. PGK(JX154676)



191 was used as an internal control to normalize the data. For each sample, three biological  
192 repeats were performed, the relative expression levels were calculated using the  
193 standard curve and normalized by the control's expression, the results were display by  
194 heatmap. The primer sequences are listed in Table S3.

195

## 196 **Results**

### 197 **Identification of *CHS* genes and sequence analysis in** 198 ***Solanaceae* species**

199 A total of 7 *CHS* (*SmCHS1-7*) genes in eggplant were identified after being verified by  
200 protein sequence analysis and BLAST search using the eggplant genome annotation  
201 database (Additional file 1 Table S1a). The length of SmCHS protein ranged from 327  
202 to 396 amino acids (Table 1, Table S2). The PKS type III active sites of the enzymes  
203 and Phe215 connected with CoA binding are conserved among all SmCHS (S1 Fig). In  
204 addition, 66 *CHS* genes were characterized from 7 other *Solanaceae* species. The  
205 subfamily numbers of *CHS* genes ranged from 6 (*Solanum penellii*) to 13 (*Petunia*  
206 *axillaris*) (Table 1, Additional file 1 Table S1b-h). The the length for the other 7  
207 *Solanaceae* species proteins ranged from 156 to 431 amino acids (Additional file 2  
208 Table S1a-g). The average number of amino acids was calculated and then employed  
209 as a data set for each species. The correlation coefficients among the above data were  
210 all greater than 0.99. This finding suggests that *CHS* genes are conserved in *Solanaceae*  
211 species.

212

213

**Table 1. Features of *SmCHS* genes identified in eggplant.**

| Gene Name     | Gene ID                 | Number of amino acids |
|---------------|-------------------------|-----------------------|
| <i>SmCHS1</i> | Sme2.5_01077.1_g00016.1 | 333                   |
| <i>SmCHS2</i> | Sme2.5_02154.1_g00001.1 | 389                   |
| <i>SmCHS3</i> | Sme2.5_13923.1_g00001.1 | 389                   |
| <i>SmCHS4</i> | Sme2.5_00283.1_g00002.1 | 392                   |
| <i>SmCHS5</i> | Sme2.5_01039.1_g00002.1 | 327                   |
| <i>SmCHS6</i> | Sme2.5_00346.1_g00019.1 | 396                   |

|               |                         |     |
|---------------|-------------------------|-----|
| <i>SmCHS7</i> | Sme2.5_05261.1_g00004.1 | 383 |
|---------------|-------------------------|-----|

214

## 215 **Structure and conserved motif analysis of *SmCHS***

216 The 7 *SmCHS* genes were distributed on 7 scaffolds. To better understand the evolution  
 217 of *SmCHS* genes, an unrooted maximum-likelihood tree was constructed based on the  
 218 7 *SmCHS* protein sequences, and the *SmCHS* were classified into 3 clusters (i, ii and  
 219 iii) (Fig 1). Among the *SmCHS* genes, only one *SmCHS7* had three exons, and the others  
 220 had two exons (Fig 1) based on information available from the genome annotation.  
 221 These results suggest the potential diversity of the biological functions of the *SmCHS*  
 222 genes in eggplants.

223

### 224 **Fig 1. Phylogenetic relationship and gene structure analysis of *SmCHS* genes.**

225

226 The phylogenetic tree was on the left of the figure and showed that the *SmCHS* genes  
 227 were classified into three clusters (i, ii and iii). The exon/intron organization of *SmCHS*  
 228 is shown on the right of the figure. For *SmCHS* gene organization, yellow boxes  
 229 represent exons, black lines represent introns, and green boxes indicate  
 230 upstream/downstream regions. The lengths of the exons and introns are drawn to scale.

231

232 To understand the functional diversification of *SmCHS*, the conserved motifs of these  
 233 7 protein sequences were identified by the MEME program, and 10 conserved motifs  
 234 were detected in eggplant (Fig 2, Table 2). The Chal\_sti\_synt\_C domain and  
 235 Chal\_sti\_synt\_N domain were included in motifs 1 and motifs 2, respectively. For all 7  
 236 eggplant *SmCHS* proteins, Motif 1 and motif 2 exist in all of them, motif 3 is only  
 237 absent in *SmCHS5*, and motif 4 and motif 5 are only absent in *SmCHS1*. The N-terminal  
 238 domain (PF00195) of the CHS protein contained motif 1 and the combination of motifs  
 239 3, 4, 6, 7 and 9. The C-terminal domain (PF02797) of the CHS protein contained motif  
 240 2 and the combination of motifs 5, 8 and 10. Therefore, the motif configuration of the  
 241 *SmCHS* reflects the conservation and diversity of the CHS family. To further

242 investigate the subcellular localization information of SmCHS proteins, the WoLF  
 243 PSORT program was used to predict the localization of SmCHS protein [31]. SmCHS7  
 244 was predicted to localize in the nucleus, and SmCHS4 and SmCHS6 were predicted to  
 245 localize in the chloroplast. The others SmCHS proteins were predicted to localize in the  
 246 cytoplasmic. The different compositions of the domains and subcellular localization  
 247 may indicate functional diversity.

248

249

**Table 2 List of the putative motifs of CHS proteins**

| Motif    | Width | Best possible match                                                                                            |
|----------|-------|----------------------------------------------------------------------------------------------------------------|
| Motif 1  | 167   | IKEWGQPKSKITHLVFCTTSGVDMPGADYQLTKLLGLRPSVKRFM<br>MYQQGCFAGGTVLRRLAKDLAENNKGARVLVVCSEITAVGFRGPSE<br>THPDSL VGQA |
| Motif 2  | 57    | DWNSJFWIAHPGGPAILDQVELKLGLKPEKLRATRQVLSYGNMSS<br>ACVLFILDEMR                                                   |
| Motif 3  | 56    | RLCDKSMIKKRYMHLTEEILKENPNLCEYMAPSLDARQDIVVVEVP<br>KLGKEAAQKA                                                   |
| Motif 4  | 38    | QRAEGPATILAIGTATPSNCVDQSTYPDYYFRITNSEH                                                                         |
| Motif 5  | 27    | TTGEGLDWGVLLGFGPGLTIETIVLHS                                                                                    |
| Motif 6  | 11    | LIEAFEPLGIS                                                                                                    |
| Motif 7  | 8     | MVTVEEVR                                                                                                       |
| Motif 8  | 6     | FCEKLI                                                                                                         |
| Motif 9  | 7     | QNIGKVN                                                                                                        |
| Motif 10 | 7     | ELKEKFK                                                                                                        |

250

251 **Fig 2. Motifs conserved across all CHS proteins in eggplant.** Ten conserved motifs  
 252 are indicated in differently colored boxes.

253

## 254 **Stress-related *cis*-elements in *SmCHS* promoters**

255 To further study the potential regulatory mechanisms of *SmCHS* during abiotic stress  
 256 responses, the 2 kb upstream sequences from the translation start sites of *SmCHS* were  
 257 used to identify the *cis*-elements (Fig 3B). The results showed that all *SmCHS* had  
 258 common upstream promoter elements, including TATA-box and CAAT-box, which  
 259 occurred more than 100 times; therefore, these sequences were presumed to be the  
 260 promoter sequences (Fig 3A). The elicitor response (ERE) and myeloblastosis (MYB)

261 occurred more than 10 times in the *SmCHS* upstream sequences. Research has shown  
262 that an increase in CHS activity causes a high accumulation of flavonoids that inhibits  
263 polar auxin transport [8, 39, 40]. Two *cis*-acting elements (ABRE, involved in abscisic  
264 acid responsiveness; AuxRR, involved in auxin responsiveness) were found in the  
265 upstream regions. MYB and myelocytomatosis (MYC) binding sites have also been  
266 identified, which may greatly influence plant stress tolerance. Cluster analysis of *cis*-  
267 element number showed that 7 *SmCHS* genes were divided into 3 groups ( I , II , III),  
268 and *SmCHS1*, *SmCHS2* and *SmCHS3* had similar regulatory pattern (Fig 3A). Five *cis*-  
269 elements (CARE, GCN4-motif, GT1-motif, MRE and TCT-motif) exist only in group  
270 I , GARE-motif only exist in group III. STRE exist in group II and III. These  
271 results showed that *SmCHS* is activated by a wide range of environmental and  
272 developmental stimuli, and there are many complex means of regulating *SmCHS*  
273 activity in eggplants.

274

275 **Fig 3. *Cis*-elements in *CHS* family gene promoters.** (A) Frequency of *cis*-element  
276 occurrence in upstream sequences. (B) Predicted *cis*-elements in *CHS* gene promoters.  
277 The scale bar indicates the length of promoters.

278

## 279 **Phylogenetic analysis of *CHS* genes in Solanaceae**

280 To analyze the evolutionary relationships of *CHS* genes in Solanaceae, an unrooted  
281 phylogenetic tree was constructed using full-length amino acid sequences. All 73 *CHS*  
282 genes were classified into 10 groups (Fig 4, Table 3), and the number of *CHS* gene  
283 groups ranged from two to eleven. The 7 *SmCHS* were categorized into 6 groups  
284 (groups I, II, VII, VIII, IX and X), and group II contained *SmCHS1* and *SmCHS2*. Groups  
285 I, II, IX and X exist in all eight species, and groups III, IV and V were absent in *Solanum*  
286 *melongena* L., *Solanum penellii*, *Solanum lycopersicum* and *Solanum tuberosum* L..  
287 The group VI is absent in *Capsicum annuum* L., *Nicotiana tabacum*, *Petunia inflata* and  
288 *Petunia axillaries* (Table 3). The VIII, IX and X groups are distinguished from other  
289 groups mainly depends on the position 1-164 amino acids, Groups I , II and III are

290 relatively conservative at the position 260-360 amino acids, in which the other groups  
 291 are very diverse(S1 Fig). These results suggested that the CHS were conserved, but  
 292 small variations existed among the eight species in Solanaceae and showed that  
 293 *SmCHS1*, *SmCHS2* and *SmCHS3* were more conserved than *SmCHS4* according to the  
 294 phylogenetic tree.

295

296 **Table 3. Distribution of CHS genes in the phylogenetic tree.**

| Plant Species               | Number | Phylogenetic Group |    |     |    |   |    |     |      |    |   |
|-----------------------------|--------|--------------------|----|-----|----|---|----|-----|------|----|---|
|                             |        | I                  | II | III | IV | V | VI | VII | VIII | IX | X |
| <i>Solanum melongena</i> L. | 7      | 1                  | 2  | 0   | 0  | 0 | 0  | 1   | 1    | 1  | 1 |
| <i>Solanum penellii</i>     | 6      | 1                  | 1  | 0   | 0  | 0 | 0  | 1   | 1    | 1  | 1 |
| <i>Solanum lycopersicum</i> | 7      | 1                  | 1  | 0   | 0  | 0 | 1  | 1   | 1    | 1  | 1 |
| <i>Solanum tuberosum</i> L. | 10     | 2                  | 1  | 0   | 0  | 0 | 1  | 3   | 1    | 1  | 1 |
| <i>Capsicum annuum</i> L.   | 9      | 1                  | 1  | 0   | 2  | 0 | 0  | 2   | 1    | 1  | 1 |
| <i>Nicotiana tabacum</i>    | 12     | 2                  | 2  | 0   | 0  | 1 | 0  | 3   | 0    | 2  | 2 |
| <i>Petunia inflata</i>      | 9      | 2                  | 1  | 1   | 1  | 1 | 0  | 0   | 1    | 1  | 1 |
| <i>Petunia axillaris</i>    | 13     | 1                  | 1  | 3   | 1  | 3 | 0  | 0   | 1    | 1  | 2 |

297

298 **Fig 4. Phylogenetic tree of CHS genes in Solanaceae species.** The color region is  
 299 associated with 10 groups of proteins (Group I to X).

300

### 301 **Expression profile of key anthocyanin biosynthesis genes in** 302 **eggplants under heat stress**

303 Using the RNA-seq data, a heatmap of 96 key anthocyanin biosynthesis genes (PAL,  
 304 C4H, 4CL, CHS, CHI, F3H/F3'H, F3'5'H, DFR, ANS, 3GT, MYB1, MYB2, bHLH1,  
 305 AN11, MADS1) was established under heat stress (Fig 5). The expression of  
 306 anthocyanidin synthase (ANS) and MYB2 was not identified during this sampling  
 307 period. For seven *SmCHS* genes, three (*SmCHS5*, *SmCHS6*, and *SmCHS7*) were not  
 308 identified, and the other four *SmCHS* genes were divided into two groups according to  
 309 their expression patterns. Three of those four *SmCHS* genes (*SmCHS1*, *SmCHS2*, and  
 310 *SmCHS3*) were continuously down-regulated under 38 °C and 45 °C treatment compared  
 311 with the CK. However, *SmCHS4* was up-regulated under 38 °C, but showed little change

312 at 45 °C in peel. These phenomena have also been observed in some other key gene  
313 families associated with anthocyanin biosynthesis. According to the RNA-seq results  
314 of 96 anthocyanin biosynthesis key genes in eggplant peel, *SmCHS4* showed the highest  
315 expression level at the 38 °C-3h along with eight other genes  
316 (*Sme2.5\_03336.1\_g00008.1\_PAL*, *Sme2.5\_00041.1\_g00017.1\_4CL*,  
317 *Sme2.5\_00283.1\_g00002.1\_smCHS4*, *Sme2.5\_00298.1\_g00002.1\_F3H*,  
318 *Sme2.5\_02066.1\_g00012.1\_F3H*, *Sme2.5\_04260.1\_g00001.1\_F3H*,  
319 *Sme2.5\_15970.1\_g00001.1\_F3H*, *Sme2.5\_00670.1\_g00012.1\_DFR*,  
320 *Sme2.5\_00747.1\_g00013.1\_AN11*) (Fig 6). In particular,  
321 *Sme2.5\_03336.1\_g00008.1\_PAL* expression level under 38 °C doubled but was down-  
322 regulated at 45 °C compared with CK; *Sme2.5\_00670.1\_g00012.1\_DFR*,  
323 *Sme2.5\_00747.1\_g00013.1\_AN11* expression level increased 3-4 fold and 7-10 fold  
324 under 38 °C, respectively.

325

326 **Fig 5. Heatmap of 96 key anthocyanin biosynthesis genes expression level in**  
327 **eggplants peel under heat stress.** The color box from blue to red indicate an increased  
328 expression level.

329

330 **Fig 6. Expression profiles of *SmCHS4* and eight anthocyanin biosynthesis genes in**  
331 **response to heat stress.** These genes have the highest expression level at 38 °C-3h in  
332 eggplant peel. The error bars represent the standard error of the means of three  
333 biological replicates.

334

335 **mRNA regulatory network associated with anthocyanin**  
336 **biosynthesis in eggplant**

337 A total of 4928 mRNA correlation coefficients were more than 0.9, and all of these  
338 mRNAs were functionally categorized in the GO database. The top 20 GO enrichment  
339 results of biological processes are shown in Table 4. The function was involved in the  
340 regulation of biological processes (GO:0050789), regulation of cellular metabolic

341 processes (GO:0031323) and regulation of gene expression (GO:0010468) were  
 342 collected and filtered to construct a regulatory network. In totally, 67 anthocyanin  
 343 biosynthesis key genes and 146 regulatory mRNAs were included in this regulatory  
 344 network (S2 Fig). These GO enrichment results suggest that the anthocyanin  
 345 biosynthesis pathway may be regulated by a wide range of environmental and  
 346 developmental **stimuli**.

347

348 **Table 4. Top 20 GO enrichment results of biological processes.**

| GO term                                                        | GO ID      | P value  |
|----------------------------------------------------------------|------------|----------|
| cellular biosynthetic process                                  | GO:0044249 | 0        |
| cellular nitrogen compound biosynthetic process                | GO:0044271 | 0        |
| cellular response to chemical stimulus                         | GO:0070887 | 0        |
| cellular response to stress                                    | GO:0033554 | 0        |
| regulation of biological process                               | GO:0050789 | 0        |
| regulation of cellular macromolecule biosynthetic process      | GO:2000112 | 0        |
| developmental process                                          | GO:0032502 | 0        |
| regulation of RNA biosynthetic process                         | GO:2001141 | 0        |
| regulation of cellular metabolic process                       | GO:0031323 | 0        |
| cellular component organization                                | GO:0016043 | 0        |
| response to organic substance                                  | GO:0010033 | 1.11E-16 |
| protein metabolic process                                      | GO:0019538 | 1.11E-16 |
| regulation of nitrogen compound metabolic process              | GO:0051171 | 1.11E-16 |
| regulation of gene expression                                  | GO:0010468 | 1.11E-16 |
| response to stimulus                                           | GO:0050896 | 1.11E-16 |
| regulation of nucleobase-containing compound metabolic process | GO:0019219 | 1.11E-16 |
| response to chemical                                           | GO:0042221 | 1.11E-16 |
| cell communication                                             | GO:0007154 | 1.11E-16 |
| response to stress                                             | GO:0006950 | 1.11E-16 |
| oxoacid metabolic process                                      | GO:0043436 | 2.22E-16 |

349

### 350 **Expression pattern of anthocyanin biosynthesis key genes in** 351 **different tissues under heat stress**

352 Using the qRT-PCR data, a heatmap of 20 key anthocyanin biosynthesis genes was  
 353 established in different tissues under heat stress (Fig 7). The qRT-PCR results showed  
 354 a high consistency with the RNA-seq data, which suggested that the RNA-seq data were

355 credible. Most of the *CHS* genes were expressed in peel and were expressed at low  
356 levels in other tissues. The *PAL*, *4CL* and *AN11* genes were mainly expressed in all  
357 five tissues. The *CHI*, *F3H*, *F3'5'H*, *DFR*, *3GT* and *bHLH1* genes were expressed in  
358 flower and peel. *MADS1* was expressed in stems, leaves, flowers and peels. Under heat  
359 stress, cluster i (cluster show in Fig 2) was continuously downregulation , cluster ii  
360 was up-regulated 4 times under 38 °C compared with CK in peel, and cluster iii was not  
361 detected in most eggplant tissues.

362

363 **Fig 7. Expression profiles of 20 key anthocyanin biosynthesis genes in different**  
364 **tissues.**

365

## 366 **Discussion**

367 It is well-known that the *CHS* gene family plays a significant role in the growth and  
368 development of plants. In many species, multigene families of *CHS* have been  
369 identified. For example, six *CHS* genes have been described in turnip [41]. In maize,  
370 14 complete *CHS* genes have been identified [42]. A total of 27 *CHS* genes were found  
371 in rice [43]. These studies showed that *CHS* members were divided into two or more  
372 subclasses according to phylogenetic analysis. Generally, genes grouped into the same  
373 subclasses shared similar evolutionary features, and obtained the same expression  
374 pattern. In our study, the identified sequences showed a high level of coding sequence  
375 similarity (above 90%). The *SmCHS* were classified into three clusters based on the  
376 results of the maximum-likelihood tree. At 35 °C, previous studies showed that *SmCHS1*  
377 and *SmCHS3* (Sme2.5\_01077.1\_g00016.1, Sme2.5\_13923.1\_g00001.1) were down-  
378 regulated in peels of eggplant [7], which is in keeping with our results, other two  
379 clusters *CHS* genes show different expression patterns. These results suggest the  
380 functional diversification of *SmCHS*.

381

382 Flavonoids have numerous functions and contribute to pigments, signaling molecules,  
383 and protectants against biotic and abiotic stresses. The flavonoid biosynthetic pathway



384 is one of the most intensively investigated pathways for applied biological and genetic  
385 processes, as well as for understanding gene regulation, characterizing transposable  
386 elements and producing of agronomically stress-tolerant plants and natural dietary  
387 antioxidants. biosynthesis of anthocyanins responds to environmental stressors, such as  
388 light, nutrient depletion, and temperature change. The peel color determined by the  
389 content of anthocyanin is a majority economically important trait for eggplant, and this  
390 color is modulated by the genes in the flavonoid biosynthesis pathway. Compared with  
391 other tissues, *SmMYB1* and all anthocyanin biosynthetic key genes (*SmCHS*, *SmCHI*,  
392 *SmF3H*, *SmDFR*) except *SmPAL* were dramatically up-regulated in the fruit skin of the  
393 purple cultivar [44]. The full length cDNA of *SmCHS*, *SmCHI*, *SmF3'5'H*, and *SmDFR*  
394 were isolated from eggplants by Jiang. These genes have the highest expression levels  
395 in peels except for *SmF3H*, which was detected in stems [45]. The expression profiles  
396 of these key gene families under heat stress were investigated in our study. 'These  
397 anthocyanin biosynthesis key genes (PAL, 4CL, AN11, CHI, F3H, F3'5'H, DFR, 3GT  
398 and bHLH1) show tissue specific expression, suggesting that these genes respond at the  
399 late stage of the anthocyanin pathway and directly regulate the color of fruit skin and  
400 flower.

401

402 Heat stress reduced the anthocyanin content and the enzyme activities of CHS, DFR,  
403 ANS and 3GT/UFGT in eggplant peel and strengthened the activity of PAL [35, 46].  
404 When the temperature exceeds 35 °C, the eggplant will be dehydrated and shrink, and  
405 the peel's color will lighten. CHS is a key enzyme of the flavonoid biosynthesis pathway.  
406 Most of the genes associated with flavonoid biosynthesis were down-regulated under  
407 heat stress. In this study, the genes of the flavonoid biosynthesis pathway showed tissue-  
408 specificity, and genes expressed in different phases and tended to change over time (Fig  
409 7). Under heat stress, *SmCHS4* and some anthocyanin biosynthesis related genes show  
410 different expression profiles at 38 °C-3h (Fig 6), suggest that these co-up-regulated  
411 genes contribute to protect the eggplant at beginning of heat stress defense. In addition,  
412 52 gene expression levels were reduced under heat stress, which was similar to Lv's  
413 results [7], while 35 gene expression levels were not identified. These results suggest

414 that some key anthocyanin biosynthesis genes help to protect the eggplant from damage  
415 to heat stress. Moreover, these gene families exhibited two or more expression patterns  
416 and performed multiple genetic functions to regulate anthocyanin content. Combined  
417 with regulatory networks, it is possible to further understand the regulatory mechanism  
418 of peel color in eggplants.

419

## 420 **Conclusions**

421 In this study, a genome-wide analysis of the *SmCHS* gene family in eggplants was  
422 performed. The CHS protein biochemical characteristics, phylogenetic relationships,  
423 gene structures, *cis*-regulatory elements, regulatory network and functional predictions  
424 of the *smCHS* gene family members were examined. The *SmCHS* gene family has  
425 conserved gene structure and functional diversification. CHS plays important roles in  
426 the anthocyanin biosynthesis pathway, exhibits two or more expression patterns and  
427 executes multiple functions to regulate anthocyanin content in eggplant peels under  
428 heat stress. The result of this study may contribute to the production of eggplant for  
429 further research on the functions, regulation and evolution of the CHS family.

430

## 431 **Author contributions**

432 DZ proposed the research, and ZZ and AD carried out the preparation and treatment of  
433 test materials. XL and SJ designed and performed the experiment. XW and SZ analyzed  
434 the data and wrote the manuscript. XW revised the article. All authors read and  
435 approved the final manuscript.

436

## 437 **Supporting Information**

438 **Table S1.** CHS protein sequences of *Solanum* species.

439 **Table S2.** Features of CHS genes identified in *Solanum* species.

440 **Table S3.** Primers used for real time PCR analysis.

441 **Fig S1.** Sequence alignment of all 73 CHS proteins of *Solanum* specie. Color bars on  
442 the left represent the 10 groups in Fig 4. Active site residues are highlighted in yellow,

443 malony-CoA binding sites are highlighted in blue and other conserved sequence are  
444 shown in green.

445 **Fig S2.** Interaction network key to anthocyanin biosynthesis in eggplant. The pink  
446 labels represent the CHS gene family.

447

## 448 **References:**

449 1. Dela G, Or E, Ovadia R, Nissim-Levi A, Weiss D, Oren-Shamir M. Changes in  
450 anthocyanin concentration and composition in 'Jaguar' rose flowers due to transient  
451 high-temperature conditions. *Plant Sci.* 2003; 164(3): 333-340.  
452 [https://doi.org/10.1016/S0168-9452\(02\)00417-X](https://doi.org/10.1016/S0168-9452(02)00417-X).

453 2. Nozaki K, Takamura T, Fukai S. Effects of high temperature on flower colour and  
454 anthocyanin content in pink flower genotypes of greenhouse chrysanthemum  
455 (*Chrysanthemum morifolium* Ramat.). *J Hortic Sci Biotechnol.* 2006; 81(4): 728-734.  
456 <https://doi.org/10.1080/14620316.2006.11512130>.

457 3. Mori K, Goto-Yamamoto N, Kitayama M, Hashizume K. Loss of anthocyanins in  
458 red-wine grape under high temperature. *J Exp Bot.* 2007; 58(8): 1935-1945.  
459 <https://doi.org/10.1093/jxb/erm055> PMID: 17452755.

460 4. Lin-Wang K, Micheletti D, Palmer J, Volz R, Lozano L, Espley R, et al. High  
461 temperature reduces apple fruit colour via modulation of the anthocyanin regulatory  
462 complex. *Plant Cell Environ.* 2011; 34(7): 1176-1190. <https://doi.org/10.1111/j.1365-3040.2011.02316.x> PMID: 21410713.

464 5. Movahed N, Pastore C, Cellini A, Allegro G, Valentini G, Zenoni S, et al. The  
465 grapevine VviPrx31 peroxidase as a candidate gene involved in anthocyanin  
466 degradation in ripening berries under high temperature. *J Plant Res.* 2016; 129(3): 513-  
467 526. <https://doi.org/10.1007/s10265-016-0786-3> PMID: 26825649.

468 6. Pastore C, Dal Santo S, Zenoni S, Movahed N, Allegro G, Valentini G, et al. Whole  
469 plant temperature manipulation affects flavonoid metabolism and the transcriptome of  
470 grapevine berries. *Front Plant Sci.* 2017; 8: 929.  
471 <https://doi.org/10.3389/fpls.2017.00929> PMID: 28634482.

- 472 7. Lv LL, Feng XF, Li W, Li K. High temperature reduces peel color in eggplant  
473 (*Solanum melongena*) as revealed by RNA-seq analysis. *Genome*. 2019; 62(7): 503-  
474 512. <https://doi.org/10.1139/gen-2019-0021> PMID: 31132325.
- 475 8. Dao T, Linthorst H, Verpoorte R. Chalcone synthase and its functions in plant  
476 resistance. *Phytochem Rev*. 2011; 10(3): 397. [https://doi.org/DOI.10.1007/s11101-011-](https://doi.org/DOI.10.1007/s11101-011-9211-7)  
477 9211-7 PMID: 21909286.
- 478 9. Schröder J. A family of plant-specific polyketide synthases: facts and predictions.  
479 *Trends Plant Sci*. 1997; 2(10): 373-378. [https://doi.org/10.1016/S1360-1385\(97\)01104-](https://doi.org/10.1016/S1360-1385(97)01104-7)  
480 [7](https://doi.org/10.1016/S1360-1385(97)01104-7).
- 481 10. Austin MB, Noel JP. The chalcone synthase superfamily of type III polyketide  
482 synthases. *Nat Prod Rep*. 2003; 20(1): 79-110. <https://doi.org/10.1039/b100917f> PMID:  
483 12636085.
- 484 11. Winkel-Shirley B. It takes a garden. How work on diverse plant species has  
485 contributed to an understanding of flavonoid metabolism. *Plant Physiol*. 2001; 127(4):  
486 1399-1404. <https://doi.org/10.1104/pp.127.4.1399> PMID: 11743081.
- 487 12. Pang Y, Shen G, Wu W, Liu X, Lin J, Tan F, et al. Characterization and expression  
488 of chalcone synthase gene from *Ginkgo biloba*. *Plant Sci*. 2005; 168(6): 1525-1531.  
489 <https://doi.org/10.1016/j.plantsci.2005.02.003> PMID: 24841790.
- 490 13. Winkel-Shirley B. Biosynthesis of flavonoids and effects of stress. *Curr Opin plant*  
491 *Bio*. 2002; 5(3): 218-223. [https://doi.org/10.1016/S1369-5266\(02\)00256-X](https://doi.org/10.1016/S1369-5266(02)00256-X) PMID:  
492 11960739.
- 493 14. Buer CS, Imin N, Djordjevic MA. Flavonoids: new roles for old molecules. *J Integr*  
494 *plant biol*. 2010; 52(1): 98-111. <https://doi.org/CNKI:SUN:ZWXB.0.2010-01-012>  
495 PMID: 20074144.
- 496 15. Falcone FM, Rius SP, Casati P. Flavonoids: biosynthesis, biological functions, and  
497 biotechnological applications. *Front Plant Sci*. 2012; 3: 222.  
498 <https://doi.org/10.3389/fpls.2012.00222> PMID: 23060891.
- 499 16. Glagoleva AY, Ivanisenko NV, Khlestkina EK. Organization and evolution of the  
500 chalcone synthase gene family in bread wheat and relative species. *BMC Genet*. 2019;  
501 20(1): 30. <https://doi.org/10.1186/s12863-019-0727-y> PMID: 30885129.

- 502 **17.** Chennupati P, Seguin P, Chamoun R, Jabaji S. Effects of high-temperature stress  
503 on soybean isoflavone concentration and expression of key genes involved in  
504 isoflavone synthesis. *J AgricFood Chem.* 2012; 60(51): 12421-12427.  
505 <https://doi.org/10.1021/jf3036319> PMID: 23199070.
- 506 **18.** Correia B, Rodriguez JL, Valledor L, Almeida T, Santos C, Cañal MJ, et al.  
507 Analysis of the expression of putative heat-stress related genes in relation to  
508 thermotolerance of cork oak. *J Plant Physiol.* 2014; 171(6): 399-406.  
509 <https://doi.org/10.1016/j.jplph.2013.12.004> PMID: 24594391.
- 510 **19.** Liu R, Xu C, Zhang Q, Wang S, Fang W. Evolution of the chitin synthase gene  
511 family correlates with fungal morphogenesis and adaption to ecological niches. *Sci Rep.*  
512 2017; 7: 44527. <https://doi.org/10.1038/srep44527> PMID: 28300148.
- 513 **20.** Tropf S, Kärcher B, Schröder G, Schröder J. Reaction Mechanisms of  
514 Homodimeric Plant Polyketide Synthases (Stilbene and Chalcone Synthase). A single  
515 active site for the condensing reaction is sufficient for synthesis of stilbenes, chalcones,  
516 and 6'-deoxychalcones. *J Biol Chem.* 1995; 270(14): 7922-7928.  
517 <https://doi.org/10.1074/jbc.270.14.7922> PMID: 7713888.
- 518 **21.** Ferrer J-L, Jez JM, Bowman ME, Dixon RA, Noel JP. Structure of chalcone  
519 synthase and the molecular basis of plant polyketide biosynthesis. *Nat Struct Mol Biol.*  
520 1999; 6(8): 775. <https://doi.org/10.1038/11553> PMID: 10426957.
- 521 **22.** Hideki H, Kenta S, Koji M, Tsukasa N, Satomi N, Akio O, et al. Draft genome  
522 sequence of eggplant (*Solanum melongena* L.): the representative *Solanum* species  
523 indigenous to the old world. *DNA Res.* 2014; 21(6): 649-660.  
524 <https://doi.org/10.1093/dnares/dsu027> PMID: 25233906.
- 525 **23.** Consortium PGS. Genome sequence and analysis of the tuber crop potato. *Nature.*  
526 2011; 475(7355): 189. <https://doi.org/10.1038/nature10158> PMID: 21743474.
- 527 **24.** Consortium TTG. The tomato genome sequence provides insights into fleshy fruit  
528 evolution. *Nature.* 2012; 485(7400): 635. <https://doi.org/10.1038/nature11119>.
- 529 **25.** Schmidt MH-W, Vogel A, Denton AK, Istace B, Wormit A, van de Geest H, et al.  
530 De novo assembly of a new *Solanum pennellii* accession using nanopore sequencing.  
531 *Plant Cell.* 2017; 29(10): 2336-2348. <https://doi.org/10.1105/tpc.17.00521> PMID:

532 29025960.

533 **26.** Kim S, Park M, Yeom S-I, Kim Y-M, Lee JM, Lee H-A, et al. Genome sequence  
534 of the hot pepper provides insights into the evolution of pungency in *Capsicum* species.  
535 Nat Genet. 2014; 46(3): 270. <https://doi.org/10.1038/ng.2877> PMID: 24441736.

536 **27.** Bombarely A, Moser M, Amrad A, Bao M, Bapaume L, Barry CS, et al. Insight  
537 into the evolution of the Solanaceae from the parental genomes of *Petunia hybrida*. Nat  
538 Plants. 2016; 2(6): 16074. <https://doi.org/10.1038/nplants.2016.74> PMID: 27255838.

539 **28.** Sierra N, Battey JN, Ouadi S, Bakaher N, Bovet L, Willig A, et al. The tobacco  
540 genome sequence and its comparison with those of tomato and potato. Nat Commun.  
541 2014; 5: 3833. <https://doi.org/10.1038/ncomms4833> PMID: 24807620

542 **29.** Boratyn GM, Camacho C, Cooper PS, Coulouris G, Fong A, Ma N, et al. BLAST:  
543 a more efficient report with usability improvements. Nucleic Acids Res. 2013; 41(W1):  
544 W29-W33. <https://doi.org/10.1093/nar/gkt282> PMID: 23609542.

545 **30.** Thompson JD, Gibson TJ, Plewniak F, Jeanmougin F, Higgins DG. The  
546 CLUSTAL\_X windows interface: flexible strategies for multiple sequence alignment  
547 aided by quality analysis tools. Nucleic Acids Res. 1997; 25(24): 4876-4882.  
548 <https://doi.org/10.1093/nar/25.24.4876> PMID: 9396791.

549 **31.** Tamura K, Stecher G, Peterson D, Filipinski A, Kumar S. MEGA6: molecular  
550 evolutionary genetics analysis version 6.0. Mol Biol Evol. 2013; 30(12): 2725-2729.  
551 <https://doi.org/10.1093/molbev/mst197> PMID: 24132122

552 **32.** Horton P, Park K-J, Obayashi T, Fujita N, Harada H, Adams-Collier C, et al. WoLF  
553 PSORT: protein localization predictor. Nucleic Acids Res. 2007; 35(suppl\_2): W585-  
554 W587. <https://doi.org/10.1093/nar/gkm259> PMID: 17517783.

555 **33.** Lescot M, Déhais P, Thijs G, Marchal K, Moreau Y, Van de Peer Y, et al.  
556 PlantCARE, a database of plant *cis*-acting regulatory elements and a portal to tools for  
557 *in silico* analysis of promoter sequences. Nucleic Acids Res. 2002; 30(1): 325-327.  
558 <https://doi.org/10.1093/nar/30.1.325> PMID: 11752327.

559 **34.** Subramanian B, Gao S, Lercher MJ, Hu S, Chen W-H. Evolview v3: a webserver  
560 for visualization, annotation, and management of phylogenetic trees. Nucleic Acids Res.  
561 2019. <https://doi.org/10.1093/nar/gkz357> PMID: 31114888.

- 562 **35.** Zhang S, Zhang A, Wu X, Zhu Z, Yang Z, Zhu Y, et al. Transcriptome analysis  
563 revealed expression of genes related to anthocyanin biosynthesis in eggplant (*Solanum*  
564 *melongena* L.) under high-temperature stress. BMC Plant Biol. 2019; 19(1): 1-13.  
565 <https://doi.org/10.1186/s12870-019-1960-2> PMID: 31492114.
- 566 **36.** Chen C, Xia R, Chen H, He Y. TBtools, a Toolkit for Biologists integrating various  
567 biological data handling tools with a user-friendly interface. BioRxiv. 2018: 289660.  
568 <https://doi.org/10.1101/289660>.
- 569 **37.** Smoot ME, Ono K, Ruscheinski J, Wang P-L, Ideker T. Cytoscape 2.8: new  
570 features for data integration and network visualization. Bioinformatics. 2010; 27(3):  
571 431-432. <https://doi.org/10.1093/bioinformatics/btq675> PMID: 21149340.
- 572 **38.** Livak KJ, Schmittgen TD. Analysis of relative gene expression data using real-  
573 time quantitative PCR and the  $2^{-\Delta\Delta CT}$  method. Methods. 2001; 25(4): 402-408.  
574 <https://doi.org/10.1006/meth.2001.1262> PMID: 11846609.
- 575 **39.** Jacobs M, Rubery PH. Naturally occurring auxin transport regulators. Science.  
576 1988; 241(4863): 346-349. <https://doi.org/10.1126/science.241.4863.346> PMID:  
577 17734864.
- 578 **40.** Brown DE, Rashotte AM, Murphy AS, Normanly J, Tague BW, Peer WA, et al.  
579 Flavonoids act as negative regulators of auxin transport in vivo in Arabidopsis. Plant  
580 Physiol. 2001; 126(2): 524-535. <https://doi.org/10.2307/4279917> PMID: 11402184
- 581 **41.** Zhou B, Wang Y, Zhan Y, Li Y, Kawabata S. Chalcone synthase family genes have  
582 redundant roles in anthocyanin biosynthesis and in response to blue/UV A light in turnip  
583 (*Brassica rapa*; Brassicaceae). AM J Bot. 2013; 100(12): 2458-2467.  
584 <https://doi.org/10.3732/ajb.1300305> PMID: 24197179.
- 585 **42.** Han Y, Ding T, Su B, Jiang H. Genome-wide identification, characterization and  
586 expression analysis of the chalcone synthase family in maize. Int J Mol Sci. 2016; 17(2):  
587 161. <https://doi.org/10.3390/ijms17020161> PMID: 26828478.
- 588 **43.** Han Y, Cao Y, Jiang H, Ding T. Genome-wide dissection of the chalcone synthase  
589 gene family in *Oryza sativa*. Mol Breeding. 2017; 37(10): 119.  
590 <https://doi.org/10.1007/s11032-017-0721-x>.
- 591 **44.** Zhang Y, Hu Z, Chu G, Huang C, Tian S, Zhao Z, et al. Anthocyanin accumulation

592 and molecular analysis of anthocyanin biosynthesis-associated genes in eggplant  
593 (*Solanum melongena* L.). J Agr Food Chem. 2014; 62(13): 2906-2912.  
594 <https://doi.org/10.1021/jf404574c> PMID: 24654563.

595 **45.** Jiang M, Liu Y, Ren L, Lian H, Chen H. Molecular cloning and characterization of  
596 anthocyanin biosynthesis genes in eggplant (*Solanum melongena* L.). Acta Physiol  
597 Plant. 2016; 38(7): 163. <https://doi.org/10.1007/s11738-016-2172-0>

598 **46.** Wu X, Zhang A, Zhu Z, Yao J, Zha D, Li X. Effects of High temperature Stress  
599 on Active Oxygen Metabolism, Anthocyanin Content and Its Main Synthases in  
600 Eggplant Peel. Acta Ag Jiangxi. 2018; 30(06): 1-5. <https://doi.org/10.19386>  
601 [j.cnki.jxnyxb.2018.06.01](https://doi.org/10.19386/j.cnki.jxnyxb.2018.06.01).

602



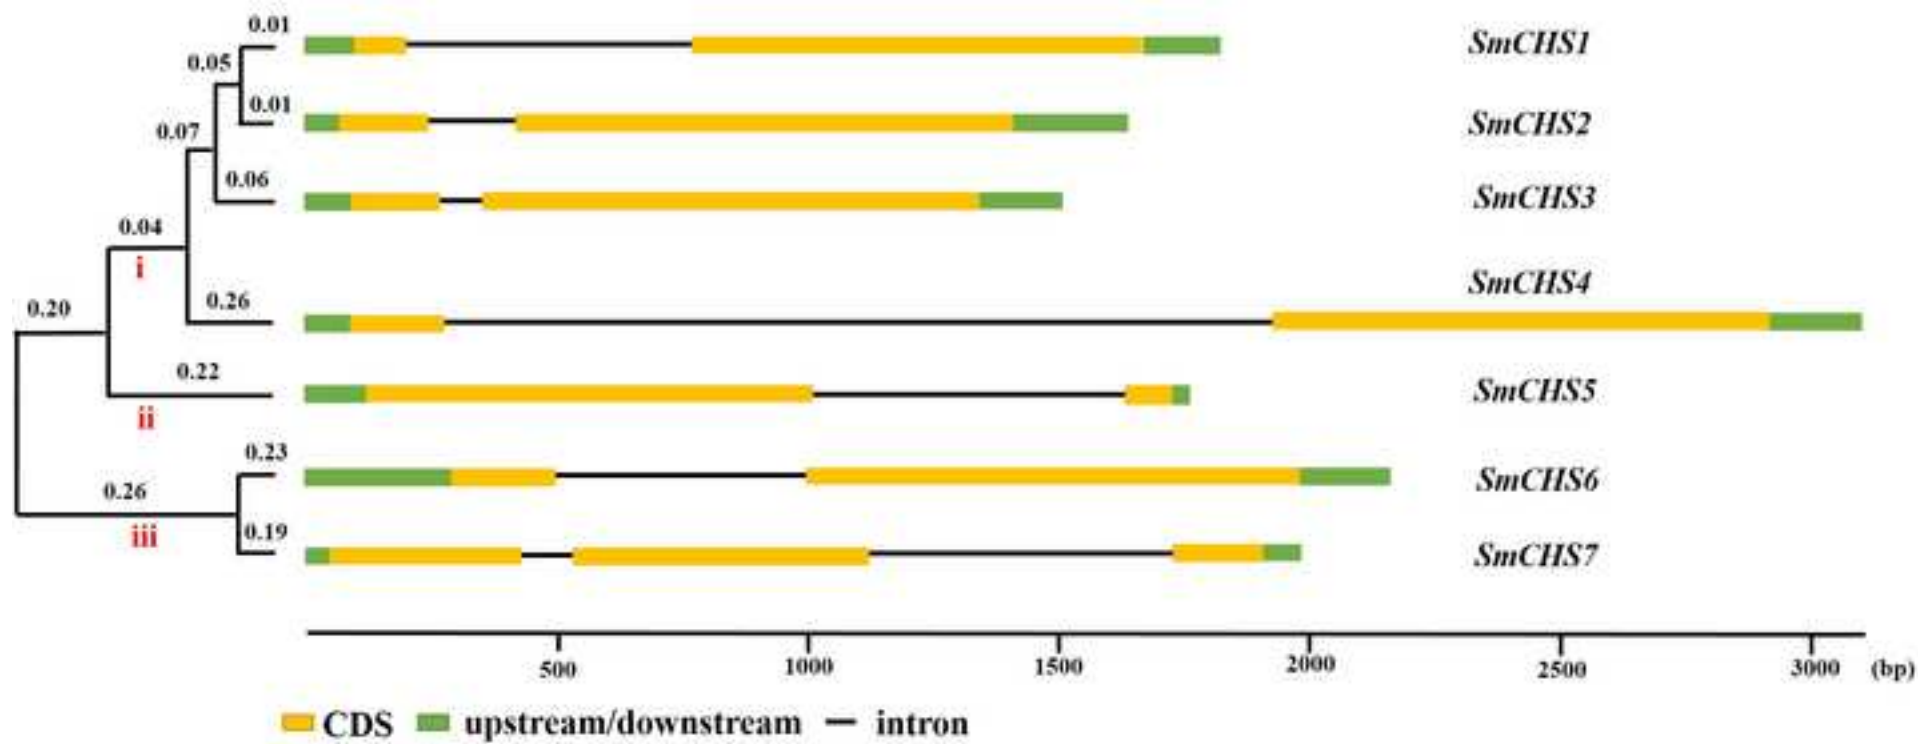

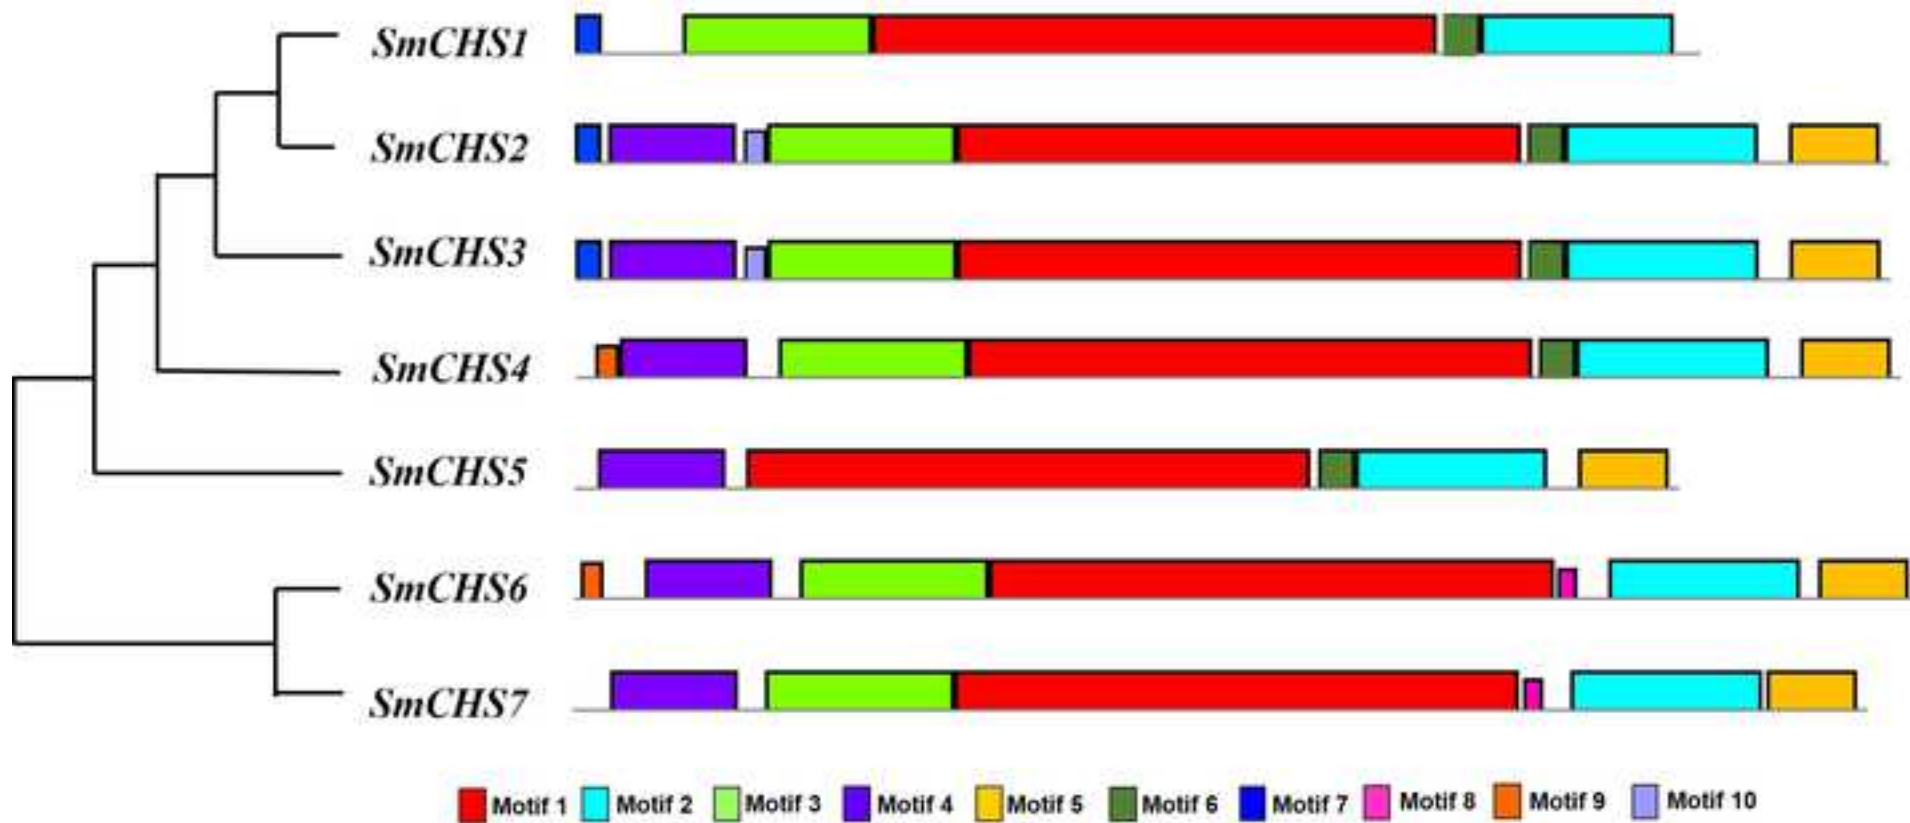



A

| <i>Cis-element</i> | <i>SmCHS7</i> | <i>SmCHS6</i> | <i>SmCHS4</i> | <i>SmCHS5</i> | <i>SmCHS2</i> | <i>SmCHS1</i> | <i>SmCHS3</i> | total |
|--------------------|---------------|---------------|---------------|---------------|---------------|---------------|---------------|-------|
| ABRE               | 0             | 1             | 1             | 0             | 1             | 0             | 2             | 5     |
| ARE                | 1             | 0             | 0             | 0             | 0             | 1             | 1             | 3     |
| AuxRR-core         | 0             | 0             | 0             | 0             | 0             | 1             | 0             | 1     |
| CAAT-box           | 12            | 10            | 17            | 22            | 14            | 9             | 16            | 100   |
| CARE               | 0             | 0             | 0             | 0             | 1             | 0             | 0             | 1     |
| CGTCA-motif        | 1             | 2             | 0             | 0             | 1             | 0             | 1             | 5     |
| ERE                | 0             | 1             | 2             | 1             | 3             | 2             | 1             | 10    |
| GARE-motif         | 1             | 0             | 0             | 0             | 0             | 0             | 0             | 1     |
| G-box              | 0             | 1             | 0             | 1             | 0             | 0             | 1             | 3     |
| GCN4-motif         | 0             | 0             | 0             | 0             | 0             | 0             | 1             | 1     |
| GT1-motif          | 0             | 0             | 0             | 0             | 0             | 3             | 2             | 5     |
| MBS                | 0             | 0             | 0             | 0             | 0             | 0             | 1             | 1     |
| MRE                | 0             | 0             | 0             | 0             | 1             | 0             | 0             | 1     |
| MYB                | 3             | 3             | 0             | 0             | 2             | 1             | 4             | 13    |
| MYC                | 0             | 5             | 1             | 1             | 0             | 1             | 1             | 9     |
| O2-site            | 0             | 0             | 0             | 1             | 1             | 1             | 0             | 3     |
| STRE               | 2             | 1             | 1             | 0             | 0             | 0             | 0             | 4     |
| TATA-box           | 4             | 12            | 21            | 21            | 26            | 16            | 15            | 115   |
| TCA                | 0             | 2             | 1             | 1             | 0             | 0             | 1             | 5     |
| TCT-motif          | 0             | 0             | 0             | 0             | 0             | 0             | 2             | 2     |
| TGACG-motif        | 0             | 1             | 2             | 0             | 2             | 0             | 0             | 5     |
| W box              | 0             | 0             | 1             | 0             | 2             | 0             | 1             | 4     |

B

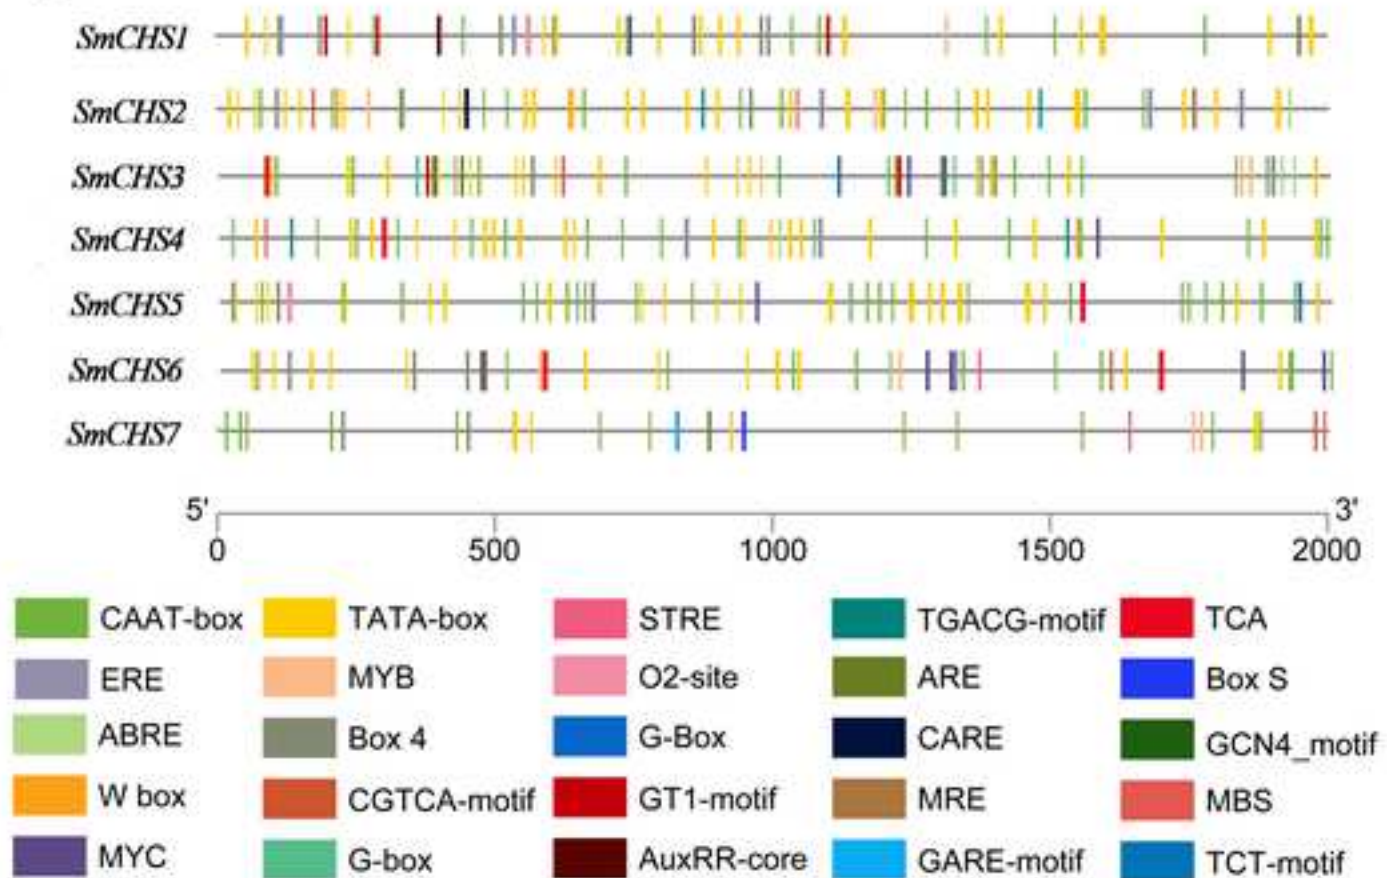



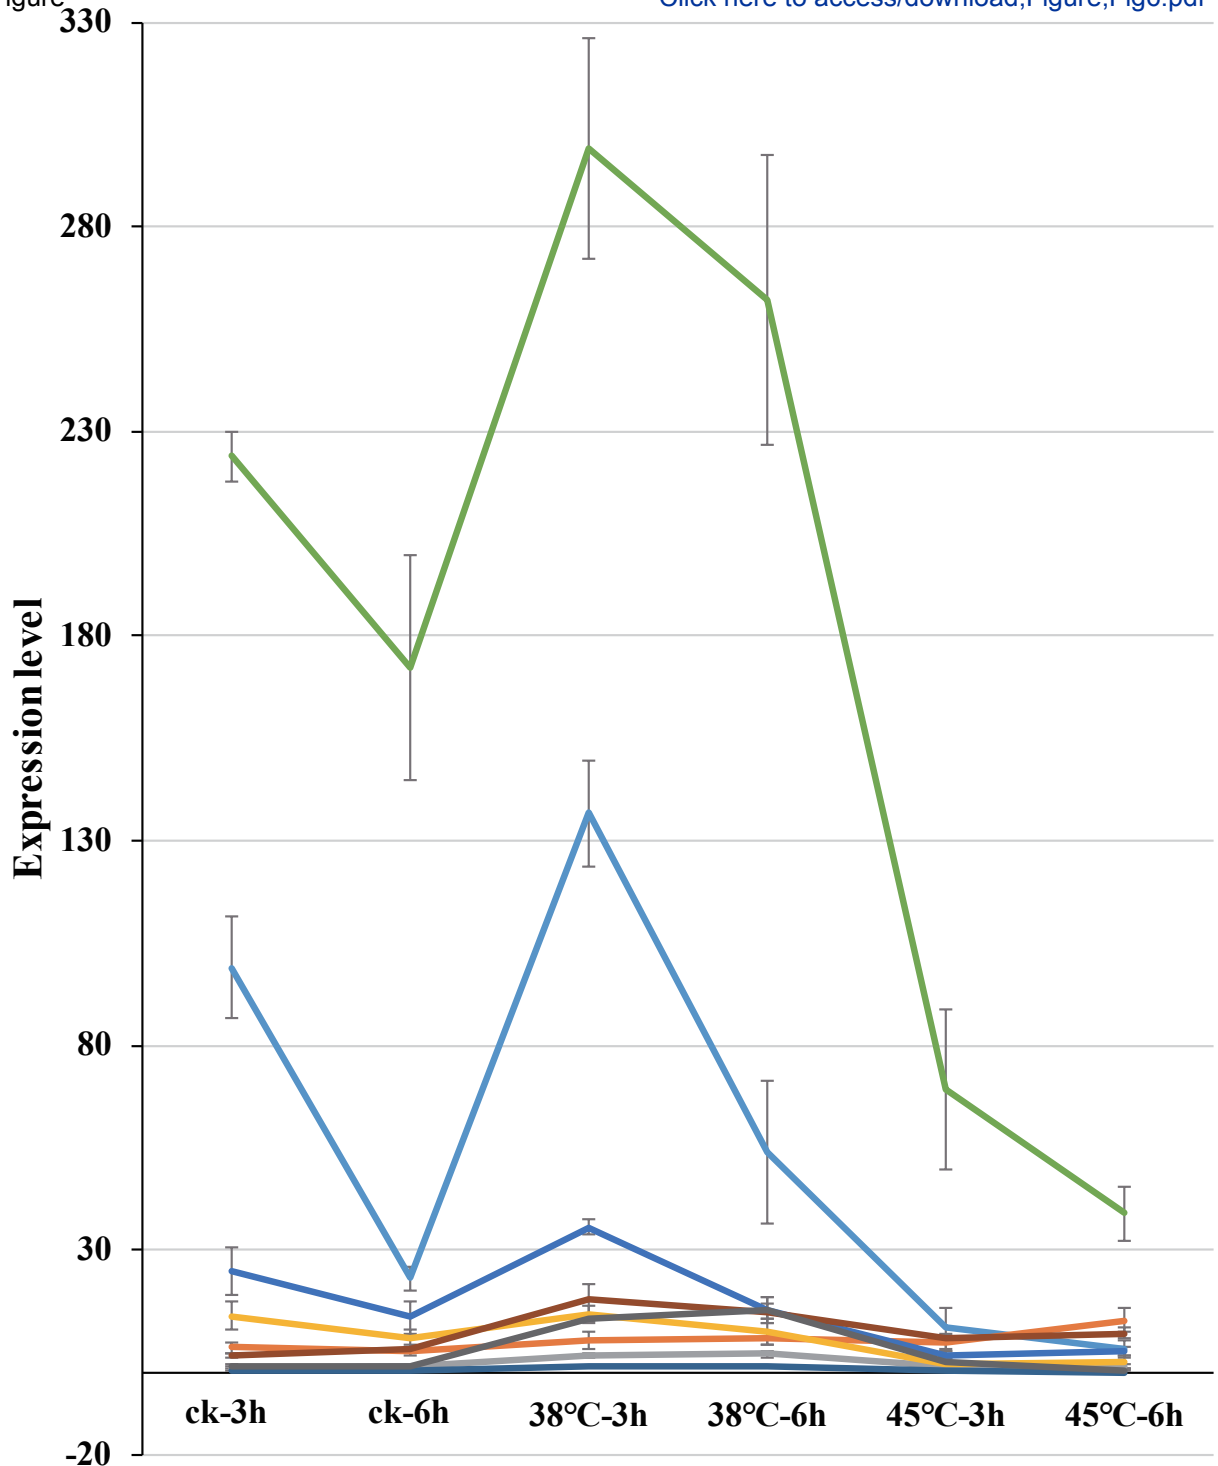

- *Sme2.5\_03336.1\_g00008.1\_PAL*
- *Sme2.5\_00041.1\_g00017.1\_4CL*
- *Sme2.5\_00283.1\_g00002.1\_smCHS4*
- *Sme2.5\_00298.1\_g00002.1\_F3H*
- *Sme2.5\_02066.1\_g00012.1\_F3H*
- *Sme2.5\_04260.1\_g00001.1\_F3H*
- *Sme2.5\_15970.1\_g00001.1\_F3H*
- *Sme2.5\_00670.1\_g00012.1\_DFR*
- *Sme2.5\_00747.1\_g00013.1\_AN11*





Click here to access/download  
**Supporting Information**  
S1 Fig.jpg







Click here to access/download  
**Supporting Information**  
S2 Fig.pdf





Click here to access/download  
**Supporting Information**  
S1 Table.xlsx



1 **Genome-wide analysis of Chalcone synthase (CHS) family**  
2 **members analysis from eggplant (*Solanum melongena* L.) in**  
3 **the flavonoid biosynthetic pathway and expression patterns**  
4 **in response to heat stress**

5  
6 **Xuexia Wu<sup>¶</sup>, Shengmei Zhang<sup>¶</sup>, Xiaohui Liu, Jing Shang, Aidong Zhang, Zongwen**  
7 **Zhu, Dingshi Zha\***

8  
9 Horticultural Research Institute, Shanghai Academy of Agricultural Sciences, Shanghai  
10 Key Laboratory of Protected Horticultural Technology, Shanghai, 201403, China \*

11 Corresponding author: Dingshi Zha

12 E-mail: dingshizha1966@126.com

13

14 <sup>¶</sup> These authors contributed equally to this work.

15

## 16 Abstract

17 Enzymes of the chalcone synthase (CHS) family participate in the synthesis of [multiple](#)  
18 ~~a series of~~ secondary metabolites in plants, fungi and bacteria. CHS showed a  
19 significant correlation with the accumulation patterns of anthocyanin. The peel color,  
20 which is primarily determined by the content of anthocyanin, is an economically  
21 important trait for eggplants that is affected by heat stress. A total of 7 *CHS* (*SmCHS1*-  
22 7) putative genes were identified in a genome-wide analysis of eggplants (*S. melongena*  
23 L.). The *SmCHS* genes were distributed on 7 scaffolds and were classified into 3 clusters.  
24 Phylogenetic relationship analysis showed that 73 *CHS* genes from 7 Solanaceae  
25 species were classified into 10 groups. *SmCHS5*, *SmCHS6* and *SmCHS7* were  
26 continuously down-regulated under 38 °C and 45 °C treatment, while *SmCHS4* was up-  
27 regulated under 38 °C but showed little change at 45 °C in peel. Expression profiles of  
28 key anthocyanin biosynthesis gene families showed that the PAL, 4CL and AN11 genes  
29 were primarily expressed in all five tissues. The CHI, F3H, F3'5'H, DFR, 3GT and  
30 bHLH1 genes were expressed in flower and peel. Under heat stress, the expression level  
31 of 52 key genes were reduced under heat stress. In contrast, the expression patterns of  
32 eight key genes similar to *SmCHS4* were up-regulated at 38 °C 3h. Comparative analysis  
33 of putative CHS protein biochemical characteristics, *cis*-regulatory elements, and  
34 regulatory networks indicated that *SmCHS* gene family has a conserved gene structure  
35 and functional diversification. *SmCHS* showed two or more expression patterns and  
36 performed multiple functions to regulate anthocyanin content. Combined with analysis  
37 of regulatory networks, the results of this study may facilitate further research to  
38 understand the regulatory mechanism governing peel color in eggplants.

39

## 40 Introduction

41 Eggplant (*S. melongena* L.) is one of the most important thermophilic vegetables  
42 produced in many tropical and temperate regions around the world. The optimum  
43 growth temperature for eggplant is between 22 and 30 °C. Eggplants subjected to  
44 high temperature may exhibit to stagnation of growth, abortion of flower buds, and

45 decrease of pollen viability rate and fruit set, and the peel's color will turn light when  
46 the temperature is over 35 °C. High temperature severely reduces the yield and affects  
47 the appearance quality of eggplant. However, the molecular mechanism governing high  
48 temperature stress in eggplants has not been thoroughly elucidated.

49

50 Anthocyanins are plant secondary metabolites and are among the most abundant natural  
51 pigments, that are responsible for the characteristic colors in flowers, fruits and  
52 vegetables plant tissues. The anthocyanin biosynthesis pathway has been studied in  
53 numerous plant species and most of the genes involved in this process have been  
54 identified. Moreover, anthocyanins play an important role in plant survival under  
55 stressful environmental conditions. High temperatures are known to reduce  
56 anthocyanin accumulation and have discoloration effects in many plant tissues, causing  
57 drastic effects in colored flowers [1, 2], and affecting the skin of such fruits as grape  
58 berries, apples and eggplant [3-7].

59

60 It is well known that CHS is the gatekeeper of the anthocyanin pathway [8]. Enzymes  
61 of chalcone synthase (CHS) are member of the plants-specific type III polyketide  
62 synthase (PKS) [9, 10], family and catalyze the first committed step of the branch of  
63 the phenylpropanoid pathway, which leads to the synthesis of flavonoids [11, 12].  
64 Flavonoids are well known as a group of plant secondary metabolites that comprise  
65 several different classes of compounds, such as chalcones, flavones, flavonol  
66 isoflavones and anthocyanins. Flavonoids have a wide variety of biological functions  
67 in, for instance, flower pigmentation, protection against UV radiation, pathogen defense,  
68 auxin transport and pollen fertility [13-15]. CHS also showed a significant correlation  
69 with the accumulation patterns of anthocyanin synthesis of flavonoid compounds  
70 during heat stress defense. —In bread wheat, heat stress responsive element has been  
71 found in the promoter of *Chs-D1* gene [16]. High-temperature stress had a large impact  
72 on the expression of *CHS7*, *CHS8* in both seeds and pods of Soybean [17]. The  
73 transcript levels of *CHS* decreased in apple peel and rose flower after heat treatment [1,

74 4]. In cork oak, *CHS* gene expression exhibited an increase under 45 °C, but showed  
75 a decreased expression at 55 °C [18]. The emergence of *CHSV* and *CHSVII* is important  
76 for the development of fungal heat stress tolerance and pathogenicity in pathogenic  
77 fungi. [19]. In addition, *CHS* (Sme2.5\_00283.1\_g00002.1) was up-regulated, and the  
78 other two *CHS* gene members were down-regulated under heat stress in peel of eggplant  
79 [7].

80 - After heat treatment, the transcript levels of *CHS* decreased in the rose flower and in  
81 the eggplant [1, 7].

82 The product of the *CHS* reaction is a pivotal precursor for a large array of secondary  
83 metabolites derived from malonyl-CoA and p-coumaroyl-CoA. *CHS* exists as  
84 homodimeric iterative PKS (monomer size of 42–45 kDa) with two independent active  
85 sites that catalyze a series of decarboxylation, condensation, and cyclization reactions  
86 [10, 20]. Member of the *CHS* superfamily share high similarity in their amino acid  
87 sequence, which contains the structurally conserved catalytic center consisting of four  
88 residues, Cys-His-Asn-Phe, and most of the genes contain two exons and one intron  
89 [21]. However, the *CHS* gene family has not been characterized in eggplants to date.

90 ~~Anthocyanins are plant secondary metabolites and are among the most abundant natural~~  
91 ~~pigments, that are responsible for the characteristic colors in flowers, fruits and~~  
92 ~~vegetables plant tissues. The anthocyanin biosynthesis pathway has been studied in~~  
93 ~~numerous plant species and most of the genes involved in this process have been~~  
94 ~~identified. The enzymes evolved in anthocyanin biosynthesis are as follows:~~  
95 ~~phenylalanine ammonia lyase (PAL), cinnamate 4 hydroxylase (C4H), 4-~~  
96 ~~coumarateCoA ligase (4CL), chalcone synthase (CHS), chalcone isomerase (CHI),~~  
97 ~~flavanone 3-hydroxylase (F3H), flavonoid 3'-hydroxylase (F3'H), flavonoid 3'-5'-~~  
98 ~~hydroxylase (F3'5'H), dihydroflavonol4 reductase (DFR), anthocyanidin synthase~~  
99 ~~(ANS), and anthocyanidin 3-O-glucosyltransferase (3GT). Most transcription factors,~~  
100 ~~such as myeloblastosis (MYB) and basic helix loop helix (bHLH), are positive~~  
101 ~~regulators of anthocyanin biosynthesis in vegetative tissues. The production of~~  
102 ~~chalcone requires the condensation of one molecule of p-coumaroyl-CoA and three~~  
103 ~~malonyl-CoA molecules which is catalyzed by CHS. Taken together, these findings~~

104 indicate that CHS is the gatekeeper of the anthocyanin pathway.  
105 Anthocyanins play an important role in plant survival under stressful environmental  
106 conditions. High temperatures are known to reduce anthocyanin accumulation and have  
107 discoloration effects in many plant tissues, causing drastic effects in colored flowers,  
108 and affecting the skin of such fruits as grape berries, apples and eggplant.  
109 Eggplant (*S. melongena* L.) is one of the most important thermophilic vegetables  
110 produced in many tropical and temperate regions around the world. The optimum  
111 growth temperature for eggplant is between 22 and 30°C. Eggplants subjected to high  
112 temperature may exhibit to stagnation of growth, abortion of flower buds, and decrease  
113 of pollen viability rate and fruit set, and the peel's color will turn light when the  
114 temperature is over 35°C. High temperature severely reduces the yield and affects the  
115 appearance quality of eggplant. However, the molecular mechanism governing high  
116 temperature stress in eggplants has not been thoroughly elucidated.  
117 In the current study, all *SmCHS* family members were identified in eggplant. A  
118 comprehensive analysis of members was performed, including gene structures, the  
119 biochemical characteristics of putative CHS protein, promoter *cis*-elements,  
120 phylogenetic relationships among members in other relative species, and their  
121 expression profiles in various organs/tissues under high temperature stress. The  
122 findings of the present study may facilitate functional studies on eggplant *SmCHS*  
123 family genes.

124

## 125 **Materials and methods**

### 126 **Plant materials and RNA extraction**

127 The eggplant cultivar 'Tewangda' is a cold-tolerant cultivar with blackish purple skin.  
128 This cultivar grows vigorously and has good fruit setting. The fruit shape has a 27.6\_  
129 cm fruit length, a 5.4\_-cm transverse diameter and a 209\_-g single fruit weight on  
130 average. The 'Tewangda' fruit has good commercial properties and good transportation  
131 resistance. 'Tewangda' fruits were grown at the same growth stage and were randomly  
132 selected. These plants were grown 144 days after sowing, and then placed inside

133 incubators set at 27 °C (CK), 38 °C or 45 °C for 3 or 6 h (three plants per treatment). For  
134 each treatment, the tissue samples of root, stem, leaf, flower and peel were obtained  
135 and immediately frozen in liquid nitrogen and stored at -80 °C for RNA extraction and  
136 other analyses. All plant materials examined in this study were obtained from Shanghai  
137 Academy of Agricultural Sciences. Total RNA was extracted from each tissue sample  
138 using the mirVana miRNA Isolation Kit (Ambion) following the manufacturer's  
139 protocol. The extracted total RNA was stored at -80 °C. RNA integrity was evaluated  
140 using the Agilent 2100 Bioanalyzer (Agilent Technologies, Santa Clara, CA, USA).

141

## 142 **Identification of the CHS family members in the eggplant** 143 **genome**

144 The whole protein sequence of *Solanum melongena* L. (eggplant) were obtained from  
145 the Eggplant Genome DataBase (<http://eggplant.kazusa.or.jp>) [22], and those of  
146 *Solanum tuberosum* L. (potato,  
147 [http://solanaceae.plantbiology.msu.edu/pgsc\\_download.shtml](http://solanaceae.plantbiology.msu.edu/pgsc_download.shtml)) [23], *Solanum*  
148 *lycopersicum* (tomato,  
149 [https://solgenomics.net/organism/Solanum\\_lycopersicum/genome](https://solgenomics.net/organism/Solanum_lycopersicum/genome)) [24], *Solanum*  
150 *penellii* (wild tomato, [https://www.plabipd.de/project\\_spenn/start.ep](https://www.plabipd.de/project_spenn/start.ep)) [25], *Capsicum*  
151 *annuum* L. (pepper, <http://peppergenome.snu.ac.kr>) [26], *Petunia axillaris*  
152 ([https://solgenomics.net/organism/Petunia\\_axillaris/genome](https://solgenomics.net/organism/Petunia_axillaris/genome)) [27], *Petunia inflata*  
153 ([https://solgenomics.net/organism/Petunia\\_inflata/genome](https://solgenomics.net/organism/Petunia_inflata/genome)) [27], and *Nicotiana*  
154 *tabacum* (common tobacco, <https://www.ncbi.nlm.nih.gov/nuccore/AYMY000000000>)  
155 [28]. The profiles of CHS (PF00195 and PF02797) were downloaded from the Pfam  
156 protein family database (<http://pfam.xfam.org/>), and these profile sequences were used  
157 as queries to perform BLASTP searches against the protein sequence data of all the  
158 species mentioned above with a maximum E-value of  $1 \times 10^{-3}$ , respectively [29]. To  
159 further verify the exact copy number of CHS and remove redundant sequences, the  
160 Pfam database and Genome websites were also searched using “chalcone synthase” as  
161 keywords. All CHS sequences were submitted to EXPASY



162 (<https://web.expasy.org/protparam/>) to calculate the number of amino acids, molecular  
163 weights and theoretical isoelectric points (pI).

164

### 165 **Structural characterization**

166 The locations and intron numbers of CHS were acquired through the genome website.  
167 All of the acquired protein sequences were first aligned by ClustalX software with the  
168 default parameters [30]. An unrooted maximum-likelihood phylogenetic tree was  
169 constructed using MEGA6 software with a bootstrap test of 1000 times [31]. The  
170 MEME program (Version 5.0.5, <http://meme-suite.org/tools/meme>) was used to  
171 identify the conserved motif of the CHS sequences with the following parameters: any  
172 number of repetitions, maximum of 10 misfits and optimum motif width of 6-200 amino  
173 acid residues. The WoLF PSORT program was used to predict the subcellular  
174 localization information of CHS proteins (<https://www.genscript.com/wolf-psort.html>)  
175 [32].

176

### 177 **Analysis of *cis*-acting elements in SmCHS**

178 The upstream sequences (2 kb) of the *SmCHS* coding sequences in eggplant were  
179 retrieved from the genome sequence and then submitted to PlantCARE  
180 (<http://bioinformatics.psb.ugent.be/webtools/plantcare/html/>) to identify regulatory  
181 elements [33].

182

### 183 **Phylogenetic analysis of CHS genes**

184 The full-length protein sequences of all eight species in Solanaceae were used for  
185 phylogenetic analysis. All of the protein sequences were first aligned by ClustalX  
186 software with the default parameters [30]. The phylogenetic tree was generated with  
187 MEGA6 software with a bootstrap test of 1000 times. The final tree was viewed and  
188 modified in Evolview software [34]. The CHS genes were classified into different  
189 groups according to the topology of the phylogenetic tree.

190

## Expression analysis of anthocyanin biosynthetic genes and

### Construction of the mRNA regulatory network

The RNA-seq results were obtained by our lab [35]. Gene expression level was estimated from mean FPKM (fragments per kilobase of exon model per million reads mapped) values for each treatment, and showed the expression patterns in heatmap. Significant differentially expressed genes (fold change  $\geq 2$  and  $p$ -value  $\leq 0.05$ ) were used to calculate the Pearson correlation coefficient between *CHS* genes and other genes. The TBtools program was used to elucidate the Gene Ontology (GO) functional classification for the mRNAs with correlation coefficients greater than 0.9 [36]. The top 5 regulatory mRNAs annotated by GO enrichment for the genes associated with anthocyanin biosynthesis were collected to construct the regulatory network. The network was visualized using Cytoscape [37].

### **qRT-PCR analysis**

Expression level of anthocyanin biosynthesis genes, including phenylalanine ammonia lyase (PAL), cinnamate 4-hydroxylase (C4H), 4-coumarateCoA ligase (4CL), CHS, chalcone isomerase (CHI), flavanone 3-hydroxylase (F3H), flavonoid 3'-hydroxylase (F3'H), flavonoid 3'5'-hydroxylase (F3'5'H), dihydroflavonol4-reductase (DFR), anthocyanidin synthase (ANS), anthocyanidin 3-O-glucosyltransferase (3GT), Anthocyanins11 (AN11), and most transcription factors, such as myeloblastosis (MYB), basic helix-loop-helix (bHLH) and metadata authority description schema(MADS1), were analyzed. First-strand cDNA was synthesized from 1  $\mu$ g from 5 tissues (root, stem, leaf, flower and peel) using a Prime Script RT Reagent Kit (Takara, Dalian, China). The qRT-PCR reactions were performed in 96-well plates using the ABI 7500 fast Real-Time PCR system (Applied Biosystems, USA) with the QuantiFast SYBR Green PCR Kit (Qiagen, Duesseldorf, Germany). The qRT-PCR parameters were as follows: 95 °C for 5 min, then 45 cycles of 95 °C for 10 s, 60 °C for 10 s, and 72 °C for 10 s. The relative mRNA expression levels were calculated using the  $2^{-\Delta\Delta CT}$  method [38]. PGK(JX154676) was used as an internal control to normalize the data. For each sample, three biological

220 ~~repeats were performed, the relative expression levels were calculated using the~~  
221 ~~standard curve and normalized by the control's expression, the results were display by~~  
222 ~~heatmap.~~ The primer sequences are listed in [Additional file 3 Table S1S3](#).

223

## 224 **Results**

### 225 **Identification of *CHS* genes and sequence analysis in** 226 **Solanaceae species**

227 A total of 7 *CHS* (*SmCHS1-7*) genes in eggplant were identified after being verified by  
228 protein sequence analysis and BLAST search using the eggplant genome annotation  
229 database (Additional file 1 Table S1a). The length of SmCHS protein ranged from 327  
230 to 396 amino acids (Table 1, [Table S2](#)). [The PKS type III active sites of the enzymes](#)  
231 [and Phe215 connected with CoA binding are conserved among all SmCHS \(S1 Fig\).](#)  
232 ~~The molecular weights of SmCHS were between 35.2 kDa and 43.7 kDa. The~~  
233 ~~theoretical pI value of SmCHS ranged from 5.59 to 7.04.~~ In addition, 66 *CHS* genes  
234 were characterized from 7 other Solanaceae species. The subfamily numbers of *CHS*  
235 genes ranged from 6 (*Solanum penellii*) to 13 (*Petunia axillaris*) (Table 1, Additional  
236 file 1 Table S1b-h). ~~The molecular weights of CHS for the other 7 Solanaceae species~~  
237 ~~ranged from 17.3 to 47.4,~~ the length ~~for the other 7 Solanaceae species~~ of proteins  
238 ranged from 156 to 431 amino acids, ~~and the theoretical pI value ranged from 5.1 to~~  
239 ~~8.47~~ (Additional file 2 Table S1a-g). The average number of amino acids, ~~molecular~~  
240 ~~weight and theoretical pI were was~~ calculated and then employed as a data set for each  
241 species. The correlation coefficients among the above data were all greater than 0.99.  
242 This finding suggests that *CHS* genes are conserved in Solanaceae species.

243

244 **Table 1. Features of *SmCHS* genes identified in eggplant.**

| Gene Name     | Gene ID                 | Number of amino acids |
|---------------|-------------------------|-----------------------|
| <i>SmCHS1</i> | Sme2.5_01077.1_g00016.1 | 333                   |
| <i>SmCHS2</i> | Sme2.5_02154.1_g00001.1 | 389                   |
| <i>SmCHS3</i> | Sme2.5_13923.1_g00001.1 | 389                   |
| <i>SmCHS4</i> | Sme2.5_00283.1_g00002.1 | 392                   |

|               |                         |     |
|---------------|-------------------------|-----|
| <i>SmCHS5</i> | Sme2.5_01039.1_g00002.1 | 327 |
| <i>SmCHS6</i> | Sme2.5_00346.1_g00019.1 | 396 |
| <i>SmCHS7</i> | Sme2.5_05261.1_g00004.1 | 383 |

245

## 246 **Structure and conserved motif analysis of *SmCHS***

247 The 7 *SmCHS* genes were distributed on 7 scaffolds. To better understand the evolution  
 248 of *SmCHS* genes, an unrooted maximum-likelihood tree was constructed based on the  
 249 7 *SmCHS* protein sequences, and the *SmCHS* were classified into 3 clusters (i, ii and  
 250 iii) (Fig 1). Among the *SmCHS* genes, only one *SmCHS7* had three exons, and the others  
 251 had two exons (Fig 1) based on information available from the genome annotation.  
 252 These results suggest the potential diversity of the biological functions of the *SmCHS*  
 253 genes in eggplants.

254

### 255 **Fig 1. Phylogenetic relationship and gene structure analysis of *SmCHS* genes.**

256

257 The phylogenetic tree was on the left of the figure and showed that the *SmCHS* genes  
 258 were classified into three clusters (i, ii and iii). The exon/intron organization of *SmCHS*  
 259 is shown on the right of the figure. For *SmCHS* gene organization, yellow boxes  
 260 represent exons, black lines represent introns, and green boxes indicate  
 261 upstream/downstream regions. The lengths of the exons and introns are drawn to scale.

262

263 To understand the functional diversification of *SmCHS*, the conserved motifs of these  
 264 7 protein sequences were identified by the MEME program, and 10 conserved motifs  
 265 were detected in eggplant (Fig 2, Table 2). [The Chal sti synt C domain and](#)  
 266 [Chal sti synt N domain were included in motifs 1 and motifs 2, respectively.](#) For all 7  
 267 eggplant *SmCHS* proteins, Motif 1 and ~~M~~motif 2 exist in all of them, ~~m~~Motif 3 is only  
 268 absent in *SmCHS5*, and ~~m~~Motif 4 and ~~m~~Motif 5 are only absent in *SmCHS1*. The N-  
 269 terminal domain (PF00195) of the CHS protein contained ~~m~~Motif 1 and the  
 270 combination of ~~m~~Motifs 3, 4, 6, 7 and 9. The C-terminal domain (PF02797) of the CHS  
 271 protein contained ~~m~~Motif 2 and the combination of ~~m~~Motifs 5, 8 and 10. Therefore, the

272 motif configuration of the SmCHS reflects the conservation and diversity of the CHS  
 273 family. To further investigate the subcellular localization information of SmCHS  
 274 proteins, the WoLF PSORT program was used to predict the localization of SmCHS  
 275 protein [31]. SmCHS7 was predicted to localize in the nucleus, and SmCHS4 and  
 276 SmCHS6 were predicted to localize in the chloroplast. The others SmCHS proteins  
 277 were predicted to localize in the cytoplasmic. The different compositions of the  
 278 domains and subcellular localization may indicate functional diversity.

279

280

**Table 2 List of the putative motifs of CHS proteins**

| Motif    | Width | Best possible match                                                                                            |
|----------|-------|----------------------------------------------------------------------------------------------------------------|
| Motif 1  | 167   | IKEWGPQPSKITHLVFCTTSGVDMPGADYQLTKLLGLRPSVKRFM<br>MYQQGCFAGGTVLRRLAKDLAENNKGARVLVVCSEITAVGFRGPSE<br>THPDSL VGQA |
| Motif 2  | 57    | DWNSJFWIAHPGGPAILDQVELKLGKPEKLRATRQVLSYGNMSS<br>ACVLFILDEMR                                                    |
| Motif 3  | 56    | RLCDKSMIKKRYMHLTEELKENPNLCEYMAPSLDARQDIVVVEVP<br>KLGKEAAQKA                                                    |
| Motif 4  | 38    | QRAEGPATILAI GTATPSNCVDQSTYPDYYFRITNSEH                                                                        |
| Motif 5  | 27    | TTGEGLDWGVLLGFGPGLTIETIVLHS                                                                                    |
| Motif 6  | 11    | LIEAFEPLGIS                                                                                                    |
| Motif 7  | 8     | MVTVEEVR                                                                                                       |
| Motif 8  | 6     | FCEKLI                                                                                                         |
| Motif 9  | 7     | QNIGKVN                                                                                                        |
| Motif 10 | 7     | ELKEKFK                                                                                                        |

281

282 **Fig 2. Motifs conserved across all CHS proteins in eggplant.** Ten conserved motifs  
 283 are indicated in differently colored boxes.

284

### 285 **Stress-related *cis*-elements in *SmCHS* promoters**

286 To further study the potential regulatory mechanisms of *SmCHS* during abiotic stress  
 287 responses, the 2\_-kb upstream sequences from the translation start sites of *SmCHS* were  
 288 used to identify the *cis*-elements (Fig 3B). The results showed that all *SmCHS* had  
 289 common upstream promoter elements, including TATA-box and CAAT-box, which  
 290 occurred more than 100 times; therefore, these sequences were presumed to be the

291 promoter sequences (Fig 3A). The elicitor response (ERE) and myeloblastosis (MYB)  
292 occurred more than 10 times in the *SmCHS* upstream sequences. Research has shown  
293 that an increase in CHS activity causes a high accumulation of flavonoids that inhibits  
294 polar auxin transport [8, 39, 40]. Two *cis*-acting elements (ABRE, involved in abscisic  
295 acid responsiveness; AuxRR, involved in auxin responsiveness) were found in the  
296 upstream regions. MYB and myelocytomatosis (MYC) binding sites have also been  
297 identified, which may greatly influence plant stress tolerance. Cluster analysis of *cis*-  
298 element number showed that 7 *SmCHS* genes were divided into 3 groups ( I , II , III),  
299 and *SmCHS1*, *SmCHS2* and *SmCHS3* had similar regulatory pattern (Fig 3A). Five *cis*-  
300 elements (CARE, GCN4-motif, GT1-motif, MRE and TCT-motif) exist only in group  
301 I , GARE-motif only exist in group III. STRE exist in group II and III. These  
302 results showed that *SmCHS* is activated by a wide range of environmental and  
303 developmental stimuli, and there are many complex means of regulating *SmCHS*  
304 activity in eggplants.

305

306 **Fig 3. *Cis*-elements in *CHS* family gene promoters.** (A) Frequency of *cis*-element  
307 occurrence in upstream sequences. (B) Predicted *cis*-elements in *CHS* gene promoters.  
308 The scale bar indicates the length of promoters.

309

### 310 **Phylogenetic analysis of *CHS* genes in Solanaceae**

311 To analyze the evolutionary relationships of *CHS* genes in Solanaceae, an unrooted  
312 phylogenetic tree was constructed using full-length amino acid sequences. All 73 *CHS*  
313 genes were classified into 10 groups (Fig 4, Table 3), and the number of *CHS* gene  
314 groups ranged from two to eleven. The 7 *SmCHS* genes were categorized into 6 groups  
315 (groups I, II, VII, VIII, IX and X), and group II contained *SmCHS1* and *SmCHS2*. Groups  
316 I, II, IX and X exist in all eight species, and groups III, IV and V were absent in *Solanum*  
317 *melongena* L., *Solanum penellii*, *Solanum lycopersicum* and *Solanum tuberosum* L..  
318 The group VI is absent in *Capsicum annuum* L., *Nicotiana tabacum*, *Petunia inflata* and  
319 *Petunia axillaries* (Table 3). The VIII, IX and X groups are distinguished from other

Formatted: Font: Not Italic

320 groups mainly depends on the position 1-164 amino acids. Groups I, II and III are  
 321 relatively conservative at the position 260-360 amino acids, in which the other groups  
 322 are very diverse(S1 Fig). These results suggested that the CHS genes were conserved,  
 323 but small variations existed among the eight species in Solanaceae and showed that  
 324 SmCHS1, SmCHS2 and SmCHS3 were more conserved than SmCHS4 according to the  
 325 phylogenetic tree.

Formatted: Font: Not Italic

Formatted: Font: Not Italic

Formatted: Font: Not Italic

Formatted: Font: Not Italic

326

327 **Table 3. Distribution of CHS genes in the phylogenetic tree.**

| Plant Pecies                | Number | Phylogenetic Group |    |     |    |   |    |     |      |    |   |
|-----------------------------|--------|--------------------|----|-----|----|---|----|-----|------|----|---|
|                             |        | I                  | II | III | IV | V | VI | VII | VIII | IX | X |
| <i>Solanum melongena</i> L. | 7      | 1                  | 2  | 0   | 0  | 0 | 0  | 1   | 1    | 1  | 1 |
| <i>Solanum penellii</i>     | 6      | 1                  | 1  | 0   | 0  | 0 | 0  | 1   | 1    | 1  | 1 |
| <i>Solanum lycopersicum</i> | 7      | 1                  | 1  | 0   | 0  | 0 | 1  | 1   | 1    | 1  | 1 |
| <i>Solanum tuberosum</i> L. | 10     | 2                  | 1  | 0   | 0  | 0 | 1  | 3   | 1    | 1  | 1 |
| <i>Capsicum annuum</i> L.   | 9      | 1                  | 1  | 0   | 2  | 0 | 0  | 2   | 1    | 1  | 1 |
| <i>Nicotiana tabacum</i>    | 12     | 2                  | 2  | 0   | 0  | 1 | 0  | 3   | 0    | 2  | 2 |
| <i>Petunia inflata</i>      | 9      | 2                  | 1  | 1   | 1  | 1 | 0  | 0   | 1    | 1  | 1 |
| <i>Petunia axillaris</i>    | 13     | 1                  | 1  | 3   | 1  | 3 | 0  | 0   | 1    | 1  | 2 |

328

329 **Fig 4. Phylogenetic tree of CHS genes in Solanaceae species.** The color region is  
 330 associated with 10 groups of proteins (Group I to X).

331

332 **Expression profile of key anthocyanin biosynthesis genes in**  
 333 **eggplants under heat stress**

334 Using the RNA-seq data, a heatmap of 96 key anthocyanin biosynthesis genes (PAL,  
 335 C4H, 4CL, CHS, CHI, F3H/F3'H, F3'5'H, DFR, ANS, 3GT, MYB1, MYB2, bHLH1,  
 336 AN11, MADS1) was established under heat stress (Fig 5). The expression of  
 337 anthocyanidin synthase (ANS) and MYB2 was not identified during this sampling  
 338 period. For seven *SmCHS* genes, three (*SmCHS5*, *SmCHS6*, and *SmCHS7*) were not  
 339 identified, and the other four *SmCHS* genes were divided into two groups according to  
 340 their expression patterns. Three of those four *SmCHS* genes (*SmCHS5SmCHS1*,  
 341 *SmCHS6SmCHS2*, and *SmCHS7SmCHS3*) were continuously down-regulated under

342 38 °C and 45 °C treatment compared with the CK. However, *SmCHS4* was up-regulated  
343 under 38 °C, but showed little change at 45 °C in peel. These phenomena have also been  
344 observed in some other key gene families associated with anthocyanin biosynthesis.  
345 According to the RNA-seq results of 96 anthocyanin biosynthesis key genes in eggplant  
346 peel, *SmCHS4* showed the highest expression level at the 38 °C-3h along with eight  
347 other genes (*Sme2.5\_03336.1\_g00008.1\_PAL*, *Sme2.5\_00041.1\_g00017.1\_4CL*,  
348 *Sme2.5\_00283.1\_g00002.1\_smCHS4*, *Sme2.5\_00298.1\_g00002.1\_F3H*,  
349 *Sme2.5\_02066.1\_g00012.1\_F3H*, *Sme2.5\_04260.1\_g00001.1\_F3H*,  
350 *Sme2.5\_15970.1\_g00001.1\_F3H*, *Sme2.5\_00670.1\_g00012.1\_DFR*,  
351 *Sme2.5\_00747.1\_g00013.1\_ANII*) (Fig 67). In particular,  
352 *Sme2.5\_03336.1\_g00008.1\_PAL* expression level under 38 °C doubled but was down-  
353 regulated at 45 °C compared with CK; *Sme2.5\_00670.1\_g00012.1\_DFR*,  
354 *Sme2.5\_00747.1\_g00013.1\_ANII* expression level increased 3-4 -fold and 7-10 -fold  
355 under 38 °C, respectively.

356

357 **Fig 5. Expression profile Heatmap of 96 key anthocyanin biosynthesis genes**  
358 **expression level in eggplants peel under heat stress. The color box from blue to red**  
359 **indicate an increased expression level.**

360

361 **Fig 76. Expression profiles of *SmCHS4* and Key eight anthocyanin biosynthesis**  
362 **genes expression profiles in response to heat stress. These genes have the highest**  
363 **expression level at 38 °C-3h in eggplant peel. were observed at the highest expression**  
364 **level at 38 °C-3h. The error bars represent the standard error of the means of three**  
365 **biological replicates.**

366

## 367 **mRNA regulatory network associated with anthocyanin**

### 368 **biosynthesis in eggplant**

369 A total of 4928 mRNA correlation coefficients were more than 0.9, and all of these  
370 mRNAs were functionally categorized in the GO database. The top 20 GO enrichment



371 results of biological processes are shown in Table 4. The function was involved in the  
 372 regulation of biological processes (GO:0050789), regulation of cellular metabolic  
 373 processes (GO:0031323) and regulation of gene expression (GO:0010468) were  
 374 collected and filtered to construct a regulatory network. In totally, 67 anthocyanin  
 375 biosynthesis key genes and 146 regulatory mRNAs were included in this regulatory  
 376 network ([S1-S2](#) Fig). These GO enrichment results suggest that the anthocyanin  
 377 biosynthesis pathway may be regulated by a wide range of environmental and  
 378 developmental stimuli.

379

380 **Table 4. Top 20 GO enrichment results of biological processes.**

| GO term                                                        | GO ID      | P value  |
|----------------------------------------------------------------|------------|----------|
| cellular biosynthetic process                                  | GO:0044249 | 0        |
| cellular nitrogen compound biosynthetic process                | GO:0044271 | 0        |
| cellular response to chemical stimulus                         | GO:0070887 | 0        |
| cellular response to stress                                    | GO:0033554 | 0        |
| regulation of biological process                               | GO:0050789 | 0        |
| regulation of cellular macromolecule biosynthetic process      | GO:2000112 | 0        |
| developmental process                                          | GO:0032502 | 0        |
| regulation of RNA biosynthetic process                         | GO:2001141 | 0        |
| regulation of cellular metabolic process                       | GO:0031323 | 0        |
| cellular component organization                                | GO:0016043 | 0        |
| response to organic substance                                  | GO:0010033 | 1.11E-16 |
| protein metabolic process                                      | GO:0019538 | 1.11E-16 |
| regulation of nitrogen compound metabolic process              | GO:0051171 | 1.11E-16 |
| regulation of gene expression                                  | GO:0010468 | 1.11E-16 |
| response to stimulus                                           | GO:0050896 | 1.11E-16 |
| regulation of nucleobase-containing compound metabolic process | GO:0019219 | 1.11E-16 |
| response to chemical                                           | GO:0042221 | 1.11E-16 |
| cell communication                                             | GO:0007154 | 1.11E-16 |
| response to stress                                             | GO:0006950 | 1.11E-16 |
| oxoacid metabolic process                                      | GO:0043436 | 2.22E-16 |

381

## 382 **Expression pattern of anthocyanin biosynthesis key genes in** 383 **different tissues under heat stress**

384 Using the qRT-PCR data, a heatmap of 20 key anthocyanin biosynthesis genes was

385 established in different tissues under heat stress (Fig 76). The qRT-PCR results showed  
386 a high consistency with the RNA-seq data, which suggested that the RNA-seq data were  
387 credible. Most of the *CHS* genes were expressed in peel and were expressed at low  
388 levels in other tissues. The *PAL*, *4CL* and *AN11* genes were mainly expressed in all  
389 five tissues. The *CHI*, *F3H*, *F3'5'H*, *DFR*, *3GT* and *bHLH1* genes were expressed in  
390 flower and peel. *MADS1* was expressed in stems, leaves, flowers and peels. Under heat  
391 stress, cluster i (cluster show in Fig 2) was continuously downregulation, cluster ii  
392 was up-regulated 4 times under 38 °C compared with CK in peel, and cluster iii was not  
393 detected in most eggplant tissues.

394

395 **Fig 67. Expression profiles of 20 key anthocyanin biosynthesis genes in different**  
396 **tissues.**

397

## 398 Discussion

399 It is well-known that the *CHS* gene family plays a significant role in the growth and  
400 development of plants. In many species, multigene families of *CHS* have been  
401 identified. For example, six *CHS* genes have been described in turnip [41]. In maize,  
402 14 complete *CHS* genes have been identified [42]. A total of 27 *CHS* genes were found  
403 in rice [43]. These studies showed that *CHS* members were divided into two or more  
404 subclasses according to phylogenetic analysis. Generally, genes grouped into the same  
405 subclasses shared similar evolutionary features, and obtained the same expression  
406 pattern. In our study, the identified sequences showed a high level of coding sequence  
407 similarity (above 90%). The *SmCHS* were classified into three clusters based on the  
408 results of the maximum-likelihood tree. ~~Under heat stress, cluster i was continuously~~  
409 ~~downregulation, cluster ii was upregulated 4 times under 38°C compared with CK in~~  
410 ~~peel, and cluster iii was not detected in most eggplant tissues.~~ At 35 °C, previous studies  
411 showed that *SmCHS1* and *SmCHS3* (Sme2.5\_01077.1\_g00016.1,  
412 Sme2.5\_13923.1\_g00001.1) were down-regulated in peels of eggplant [7] ~~(Lv et al.~~  
413 ~~2019)~~, which is in keeping with our results. other two clusters *CHS* genes show different

Formatted: Font: Italic

414 expression patterns. These results suggest the functional diversification of *SmCHS*.

415

416 Flavonoids have numerous functions and contribute to pigments, signaling molecules,  
417 and protectants against biotic and abiotic stresses. The flavonoid biosynthetic pathway  
418 is one of the most intensively investigated pathways for applied biological and genetic  
419 processes, as well as for understanding gene regulation, characterizing transposable  
420 elements and producing of agronomically stress-tolerant plants and natural dietary  
421 antioxidants. biosynthesis of anthocyanins responds to environmental stressors, such as  
422 light, nutrient depletion, and temperature change. The peel color determined by the  
423 content of anthocyanin is ~~an~~ a majority economically important trait for eggplant, and  
424 this color is modulated by the genes in the flavonoid biosynthesis pathway. Compared  
425 with other tissues, *SmMYB1* and all anthocyanin biosynthetic key genes (*SmCHS*,  
426 *SmCHI*, *SmF3H*, *SmDFR*) except *SmPAL* were dramatically up-regulated in the fruit  
427 skin of the purple cultivar [44]. The full length cDNA of *SmCHS*, *SmCHI*, *SmF3'5'H*,  
428 and *SmDFR* were isolated from eggplants by Jiang. These genes have the highest  
429 expression levels in peels except for *SmF3H*, which was detected in stems [45]. The  
430 expression profiles of these key gene families under heat stress were investigated in our  
431 study. ~~The PAL, 4CL and AN11 genes were mainly expressed in all five tissues. The~~  
432 ~~CHI, F3H, F3'5'H, DFR, 3GT and bHLH1 genes were expressed in the flower and~~  
433 ~~peel. These anthocyanin biosynthesis key genes (PAL, 4CL, AN11, CHI, F3H, F3'5'H,~~  
434 ~~DFR, 3GT and bHLH1) show tissue specific expression~~, suggesting that these genes  
435 respond at the late stage of the anthocyanin pathway and directly regulate the color of  
436 fruit skin and flower.

437

438 Heat stress reduced the anthocyanin content and the enzyme activities of CHS, DFR,  
439 ANS and 3GT/UFGT in eggplant peel and strengthened the activity of PAL [35, 46].  
440 When the temperature exceeds 35 °C, the eggplant will be dehydrated and shrink, and  
441 the peel's color will lighten. CHS is a key enzyme of the flavonoid biosynthesis pathway.  
442 Most of the genes associated with flavonoid biosynthesis were down-regulated under  
443 heat stress. In this study, the genes of the flavonoid biosynthesis pathway showed tissue-

444 specificity, and genes expressed in different phases and tended to change over time (Fig  
445 ~~76~~). ~~According to the RNA-seq results of 96 anthocyanin biosynthesis key genes in~~  
446 ~~eggplant peel, *SmCHS4* showed the highest expression level at the 38°C 3h along with~~  
447 ~~eight other genes (*Smc2.5\_03336.1\_g00008.1\_PAL*, *Smc2.5\_00041.1\_g00017.1\_4CL*,~~  
448 ~~*Smc2.5\_00283.1\_g00002.1\_smCHS4*, *Smc2.5\_00298.1\_g00002.1\_F3H*,~~  
449 ~~*Smc2.5\_02066.1\_g00012.1\_F3H*, *Smc2.5\_04260.1\_g00001.1\_F3H*,~~  
450 ~~*Smc2.5\_15970.1\_g00001.1\_F3H*, *Smc2.5\_00670.1\_g00012.1\_DFR*,~~  
451 ~~*Smc2.5\_00747.1\_g00013.1\_ANH1*) (Fig 7). In particular,~~  
452 ~~*Smc2.5\_03336.1\_g00008.1\_PAL* expression level under 38°C doubled but was~~  
453 ~~downregulated at 45°C compared with CK; *Smc2.5\_00670.1\_g00012.1\_DFR*,~~  
454 ~~*Smc2.5\_00747.1\_g00013.1\_ANH1* expression level increased 3-4 fold and 7-10 fold~~  
455 ~~under 38°C, respectively. Under heat stress, *SmCHS4* and some anthocyanin~~  
456 ~~biosynthesis related genes show different expression profiles at 38 °C-3h (Fig 6).~~  
457 ~~suggest that these co-up-regulated genes contribute to protect the eggplant at beginning~~  
458 ~~of heat stress defense.~~ In addition, 52 gene expression levels were reduced under heat  
459 stress, which was similar to Lv's results [7], while 35 gene expression levels were not  
460 identified. These results suggest that some key anthocyanin biosynthesis genes help to  
461 protect the eggplant from damage to heat stress. Moreover, these gene families  
462 exhibited two or more expression patterns and performed multiple genetic functions to  
463 regulate anthocyanin content. Combined with regulatory networks, it is possible to  
464 further understand the regulatory mechanism of peel color in eggplants.

465

466 ~~Fig 7. Key anthocyanin biosynthesis gene expression profiles in response to heat~~  
467 ~~stress were observed at the highest expression level at 38°C 3h.~~

468

## 469 Conclusions

470 In this study, a genome-wide analysis of the *SmCHS* gene family in eggplants was  
471 performed. The CHS protein biochemical characteristics, phylogenetic relationships,  
472 gene structures, *cis*-regulatory elements, regulatory network and functional predictions

473 of the *smCHS* gene family members were examined. The *SmCHS* gene family has  
474 conserved gene structure and functional diversification. CHS plays important roles in  
475 the anthocyanin biosynthesis pathway, exhibits two or more expression patterns and  
476 executes multiple functions to regulate anthocyanin content in eggplant peels under  
477 heat stress. The result of this study may contribute to the production of eggplant for  
478 further research on the functions, regulation and evolution of the CHS family.

479

## 480 **Acknowledgments**

481 ~~This work was supported by the Agricultural Committee Basic Project (Shanghai~~  
482 ~~Agricultural word (2015) No. 6-2-3), the National Key Technology R&D Program~~  
483 ~~during the 13th Five Year Plan Period (2017YFD0101904) and the China Agriculture~~  
484 ~~Research System (Grant No. CARS-25). The funding bodies did not play a role in the~~  
485 ~~design of the study and the collection, analysis, and interpretation of data or in the~~  
486 ~~composition of the manuscript.~~

487

## 488 **Author contributions**

489 DZ proposed the research, and ZZ and AD carried out the preparation and treatment of  
490 test materials. XL and SJ designed and performed the experiment. XW and SZ analyzed  
491 the data and wrote the manuscript. XW revised the article. All authors read and  
492 approved the final manuscript.

493

## 494 **Supporting Information**

495 **Table S1.** CHS protein sequences of Solanum species.

496 **Table S2.** Features of CHS genes identified in Solanum species.

497 **Table S3.** Primers used for real time PCR analysis.

498 **Fig S1.** Sequence alignment of all 73 CHS proteins of Solanum specie. Color bars on  
499 the left represent the 10 groups in Fig 4. Active site residues are highlighted in yellow,  
500 malony-CoA binding sites are highlighted in blue and other conserved sequence are  
501 shown in green.

502 **Fig S1S2.** Interaction network key to anthocyanin biosynthesis in eggplant. The pink  
503 labels represent the CHS gene family.

504

## 505 **References:**

- 506 **1.** Dela G, Or E, Ovadia R, Nissim-Levi A, Weiss D, Oren-Shamir M. Changes in  
507 anthocyanin concentration and composition in 'Jaguar' rose flowers due to transient  
508 high-temperature conditions. *Plant Sci.* 2003; 164(3): 333-340.  
509 [https://doi.org/10.1016/S0168-9452\(02\)00417-X](https://doi.org/10.1016/S0168-9452(02)00417-X).
- 510 **2.** Nozaki K, Takamura T, Fukai S. Effects of high temperature on flower colour and  
511 anthocyanin content in pink flower genotypes of greenhouse chrysanthemum  
512 (*Chrysanthemum morifolium* Ramat.). *J Hortic Sci Biotechnol.* 2006; 81(4): 728-734.  
513 <https://doi.org/10.1080/14620316.2006.11512130>.
- 514 **3.** Mori K, Goto-Yamamoto N, Kitayama M, Hashizume K. Loss of anthocyanins in  
515 red-wine grape under high temperature. *J Exp Bot.* 2007; 58(8): 1935-1945.  
516 <https://doi.org/10.1093/jxb/erm055> PMID: 17452755.
- 517 **4.** Lin-Wang K, Micheletti D, Palmer J, Volz R, Lozano L, Espley R, et al. High  
518 temperature reduces apple fruit colour via modulation of the anthocyanin regulatory  
519 complex. *Plant Cell Environ.* 2011; 34(7): 1176-1190. [https://doi.org/10.1111/j.1365-](https://doi.org/10.1111/j.1365-3040.2011.02316.x)  
520 [3040.2011.02316.x](https://doi.org/10.1111/j.1365-3040.2011.02316.x) PMID: 21410713.
- 521 **5.** Movahed N, Pastore C, Cellini A, Allegro G, Valentini G, Zenoni S, et al. The  
522 grapevine VviPrx31 peroxidase as a candidate gene involved in anthocyanin  
523 degradation in ripening berries under high temperature. *J Plant Res.* 2016; 129(3): 513-  
524 526. <https://doi.org/10.1007/s10265-016-0786-3> PMID: 26825649.
- 525 **6.** Pastore C, Dal Santo S, Zenoni S, Movahed N, Allegro G, Valentini G, et al. Whole  
526 plant temperature manipulation affects flavonoid metabolism and the transcriptome of  
527 grapevine berries. *Front Plant Sci.* 2017; 8: 929.  
528 <https://doi.org/10.3389/fpls.2017.00929> PMID: 28634482.
- 529 **7.** Lv LL, Feng XF, Li W, Li K. High temperature reduces peel color in eggplant  
530 (*Solanum melongena*) as revealed by RNA-seq analysis. *Genome.* 2019; 62(7): 503-

531 512. <https://doi.org/10.1139/gen-2019-0021> PMID: 31132325.

532 **8.** Dao T, Linthorst H, Verpoorte R. Chalcone synthase and its functions in plant  
533 resistance. *Phytochem Rev.* 2011; 10(3): 397. [https://doi.org/DOI 10.1007/s11101-011-](https://doi.org/DOI%2010.1007/s11101-011-9211-7)  
534 9211-7 PMID: 21909286.

535 **9.** Schröder J. A family of plant-specific polyketide synthases: facts and predictions.  
536 *Trends Plant Sci.* 1997; 2(10): 373-378. [https://doi.org/10.1016/S1360-1385\(97\)01104-](https://doi.org/10.1016/S1360-1385(97)01104-7)  
537 [7.](https://doi.org/10.1016/S1360-1385(97)01104-7)

538 **10.** Austin MB, Noel JP. The chalcone synthase superfamily of type III polyketide  
539 synthases. *Nat Prod Rep.* 2003; 20(1): 79-110. <https://doi.org/10.1039/b100917f> PMID:  
540 12636085.

541 **11.** Winkel-Shirley B. It takes a garden. How work on diverse plant species has  
542 contributed to an understanding of flavonoid metabolism. *Plant Physiol.* 2001; 127(4):  
543 1399-1404. <https://doi.org/10.1104/pp.127.4.1399> PMID: 11743081.

544 **12.** Pang Y, Shen G, Wu W, Liu X, Lin J, Tan F, et al. Characterization and expression  
545 of chalcone synthase gene from *Ginkgo biloba*. *Plant Sci.* 2005; 168(6): 1525-1531.  
546 <https://doi.org/10.1016/j.plantsci.2005.02.003> PMID: 24841790.

547 **13.** Winkel-Shirley B. Biosynthesis of flavonoids and effects of stress. *Curr Opin plant*  
548 *Bio.* 2002; 5(3): 218-223. [https://doi.org/10.1016/S1369-5266\(02\)00256-X](https://doi.org/10.1016/S1369-5266(02)00256-X) PMID:  
549 11960739.

550 **14.** Buer CS, Imin N, Djordjevic MA. Flavonoids: new roles for old molecules. *J Integr*  
551 *plant biol.* 2010; 52(1): 98-111. <https://doi.org/CNKI:SUN:ZWXB.0.2010-01-012>  
552 PMID: 20074144.

553 **15.** Falcone FM, Rius SP, Casati P. Flavonoids: biosynthesis, biological functions, and  
554 biotechnological applications. *Front Plant Sci.* 2012; 3: 222.  
555 <https://doi.org/10.3389/fpls.2012.00222> PMID: 23060891.

556 **16.** Glagoleva AY, Ivanisenko NV, Khlestkina EK. Organization and evolution of the  
557 chalcone synthase gene family in bread wheat and relative species. *BMC Genet.* 2019;  
558 20(1): 30. <https://doi.org/10.1186/s12863-019-0727-y> PMID: 30885129.

559 **17.** Chennupati P, Seguin P, Chamoun R, Jabaji S. Effects of high-temperature stress  
560 on soybean isoflavone concentration and expression of key genes involved in

561 isoflavone synthesis. J AgricFood Chem. 2012; 60(51): 12421-12427.  
562 <https://doi.org/10.1021/jf3036319> PMID: 23199070.

563 **18.** Correia B, Rodriguez JL, Valledor L, Almeida T, Santos C, Cañal MJ, et al.  
564 Analysis of the expression of putative heat-stress related genes in relation to  
565 thermotolerance of cork oak. J Plant Physiol. 2014; 171(6): 399-406.  
566 <https://doi.org/10.1016/j.jplph.2013.12.004> PMID: 24594391.

567 **19.** Liu R, Xu C, Zhang Q, Wang S, Fang W. Evolution of the chitin synthase gene  
568 family correlates with fungal morphogenesis and adaption to ecological niches. Sci Rep.  
569 2017; 7: 44527. <https://doi.org/10.1038/srep44527> PMID: 28300148.

570 **20.** Tropf S, Kärcher B, Schröder G, Schröder J. Reaction Mechanisms of  
571 Homodimeric Plant Polyketide Synthases (Stilbene and Chalcone Synthase). A single  
572 active site for the condensing reaction is sufficient for synthesis of stilbenes, chalcones,  
573 and 6'-deoxychalcones. J Biol Chem. 1995; 270(14): 7922-7928.  
574 <https://doi.org/10.1074/jbc.270.14.7922> PMID: 7713888.

575 **21.** Ferrer J-L, Jez JM, Bowman ME, Dixon RA, Noel JP. Structure of chalcone  
576 synthase and the molecular basis of plant polyketide biosynthesis. Nat Struct Mol Biol.  
577 1999; 6(8): 775. <https://doi.org/10.1038/11553> PMID: 10426957.

578 **22.** Hideki H, Kenta S, Koji M, Tsukasa N, Satomi N, Akio O, et al. Draft genome  
579 sequence of eggplant (*Solanum melongena* L.): the representative *Solanum* species  
580 indigenous to the old world. DNA Res. 2014; 21(6): 649-660.  
581 <https://doi.org/10.1093/dnares/dsu027> PMID: 25233906.

582 **23.** Consortium PGS. Genome sequence and analysis of the tuber crop potato. Nature.  
583 2011; 475(7355): 189. <https://doi.org/10.1038/nature10158> PMID: 21743474.

584 **24.** Consortium TTG. The tomato genome sequence provides insights into fleshy fruit  
585 evolution. Nature. 2012; 485(7400): 635. <https://doi.org/10.1038/nature11119>.

586 **25.** Schmidt MH-W, Vogel A, Denton AK, Istace B, Wormit A, van de Geest H, et al.  
587 De novo assembly of a new *Solanum pennellii* accession using nanopore sequencing.  
588 Plant Cell. 2017; 29(10): 2336-2348. <https://doi.org/10.1105/tpc.17.00521> PMID:  
589 29025960.

590 **26.** Kim S, Park M, Yeom S-I, Kim Y-M, Lee JM, Lee H-A, et al. Genome sequence



591 of the hot pepper provides insights into the evolution of pungency in *Capsicum* species.  
592 Nat Genet. 2014; 46(3): 270. <https://doi.org/10.1038/ng.2877> PMID: 24441736.

593 **27.** Bombarely A, Moser M, Amrad A, Bao M, Bapaume L, Barry CS, et al. Insight  
594 into the evolution of the Solanaceae from the parental genomes of *Petunia hybrida*. Nat  
595 Plants. 2016; 2(6): 16074. <https://doi.org/10.1038/nplants.2016.74> PMID: 27255838.

596 **28.** Sierro N, Battey JN, Ouadi S, Bakaher N, Bovet L, Willig A, et al. The tobacco  
597 genome sequence and its comparison with those of tomato and potato. Nat Commun.  
598 2014; 5: 3833. <https://doi.org/10.1038/ncomms4833> PMID: 24807620

599 **29.** Boratyn GM, Camacho C, Cooper PS, Coulouris G, Fong A, Ma N, et al. BLAST:  
600 a more efficient report with usability improvements. Nucleic Acids Res. 2013; 41(W1):  
601 W29-W33. <https://doi.org/10.1093/nar/gkt282> PMID: 23609542.

602 **30.** Thompson JD, Gibson TJ, Plewniak F, Jeanmougin F, Higgins DG. The  
603 CLUSTAL\_X windows interface: flexible strategies for multiple sequence alignment  
604 aided by quality analysis tools. Nucleic Acids Res. 1997; 25(24): 4876-4882.  
605 <https://doi.org/10.1093/nar/25.24.4876> PMID: 9396791.

606 **31.** Tamura K, Stecher G, Peterson D, Filipowski A, Kumar S. MEGA6: molecular  
607 evolutionary genetics analysis version 6.0. Mol Biol Evol. 2013; 30(12): 2725-2729.  
608 <https://doi.org/10.1093/molbev/mst197> PMID: 24132122

609 **32.** Horton P, Park K-J, Obayashi T, Fujita N, Harada H, Adams-Collier C, et al. WoLF  
610 PSORT: protein localization predictor. Nucleic Acids Res. 2007; 35(suppl\_2): W585-  
611 W587. <https://doi.org/10.1093/nar/gkm259> PMID: 17517783.

612 **33.** Lescot M, Déhais P, Thijs G, Marchal K, Moreau Y, Van de Peer Y, et al.  
613 PlantCARE, a database of plant *cis*-acting regulatory elements and a portal to tools for  
614 *in silico* analysis of promoter sequences. Nucleic Acids Res. 2002; 30(1): 325-327.  
615 <https://doi.org/10.1093/nar/30.1.325> PMID: 11752327.

616 **34.** Subramanian B, Gao S, Lercher MJ, Hu S, Chen W-H. Evolview v3: a webserver  
617 for visualization, annotation, and management of phylogenetic trees. Nucleic Acids Res.  
618 2019. <https://doi.org/10.1093/nar/gkz357> PMID: 31114888.

619 **35.** Zhang S, Zhang A, Wu X, Zhu Z, Yang Z, Zhu Y, et al. Transcriptome analysis  
620 revealed expression of genes related to anthocyanin biosynthesis in eggplant (*Solanum*

621 *melongena* L.) under high-temperature stress. BMC Plant Biol. 2019; 19(1): 1-13.  
622 <https://doi.org/10.1186/s12870-019-1960-2> PMID: 31492114.

623 **36.** Chen C, Xia R, Chen H, He Y. TBtools, a Toolkit for Biologists integrating various  
624 biological data handling tools with a user-friendly interface. BioRxiv. 2018: 289660.  
625 <https://doi.org/10.1101/289660>.

626 **37.** Smoot ME, Ono K, Ruscheinski J, Wang P-L, Ideker T. Cytoscape 2.8: new  
627 features for data integration and network visualization. Bioinformatics. 2010; 27(3):  
628 431-432. <https://doi.org/10.1093/bioinformatics/btq675> PMID: 21149340.

629 **38.** Livak KJ, Schmittgen TD. Analysis of relative gene expression data using real-  
630 time quantitative PCR and the  $2^{-\Delta\Delta CT}$  method. Methods. 2001; 25(4): 402-408.  
631 <https://doi.org/10.1006/meth.2001.1262> PMID: 11846609.

632 **39.** Jacobs M, Rubery PH. Naturally occurring auxin transport regulators. Science.  
633 1988; 241(4863): 346-349. <https://doi.org/10.1126/science.241.4863.346> PMID:  
634 17734864.

635 **40.** Brown DE, Rashotte AM, Murphy AS, Normanly J, Tague BW, Peer WA, et al.  
636 Flavonoids act as negative regulators of auxin transport in vivo in Arabidopsis. Plant  
637 Physiol. 2001; 126(2): 524-535. <https://doi.org/10.2307/4279917> PMID: 11402184

638 **41.** Zhou B, Wang Y, Zhan Y, Li Y, Kawabata S. Chalcone synthase family genes have  
639 redundant roles in anthocyanin biosynthesis and in response to blue/UV A light in turnip  
640 (*Brassica rapa*; Brassicaceae). AM J Bot. 2013; 100(12): 2458-2467.  
641 <https://doi.org/10.3732/ajb.1300305> PMID: 24197179.

642 **42.** Han Y, Ding T, Su B, Jiang H. Genome-wide identification, characterization and  
643 expression analysis of the chalcone synthase family in maize. Int J Mol Sci. 2016; 17(2):  
644 161. <https://doi.org/10.3390/ijms17020161> PMID: 26828478.

645 **43.** Han Y, Cao Y, Jiang H, Ding T. Genome-wide dissection of the chalcone synthase  
646 gene family in *Oryza sativa*. Mol Breeding. 2017; 37(10): 119.  
647 <https://doi.org/10.1007/s11032-017-0721-x>.

648 **44.** Zhang Y, Hu Z, Chu G, Huang C, Tian S, Zhao Z, et al. Anthocyanin accumulation  
649 and molecular analysis of anthocyanin biosynthesis-associated genes in eggplant  
650 (*Solanum melongena* L.). J Agr Food Chem. 2014; 62(13): 2906-2912.

651 <https://doi.org/10.1021/jf404574c> PMID: 24654563.

652 **45.** Jiang M, Liu Y, Ren L, Lian H, Chen H. Molecular cloning and characterization of  
653 anthocyanin biosynthesis genes in eggplant (*Solanum melongena* L.). Acta Physiol  
654 Plant. 2016; 38(7): 163. <https://doi.org/10.1007/s11738-016-2172-0>

655 **46.** Wu X, Zhang A, Zhu Z, Yao J, Zha D, Li X. Effects of High temperature Stress  
656 on Active Oxygen Metabolism, Anthocyanin Content and Its Main Synthases in  
657 Eggplant Peel. Acta Ag Jiangxi. 2018; 30(06): 1-5. [https://doi.org/10.19386](https://doi.org/10.19386/j.cnki.jxnyxb.2018.06.01)  
658 [j.cnki.jxnyxb.2018.06.01](https://doi.org/10.19386/j.cnki.jxnyxb.2018.06.01).

659

Dear Editors

Thank you and anonymous reviewers very much for your kind and useful comments for our manuscript “Genome-wide analysis of chalcone synthase (CHS) family from eggplant (*Solanum melongena* L.) in flavonoid biosynthetic pathway and expression pattern in response to heat stress” (PONE-D-19-33168). We have read and seriously considered the comments very carefully, checked and revised the manuscript many times. Major revisions throughout the revised manuscript have been made as followings.

1. The title name have been changed to “Chalcone synthase (CHS) family analysis from eggplant (*Solanum melongena* L.) in flavonoid biosynthetic pathway and expression pattern in response to heat stress”
2. The ‘Introduction’ section has been modified according to the comments
3. The results of all 73 CHS proteins sequence alignment, conserved residues and sequence diversity were analyzed.
4. We corrected some other grammatical errors and words spelling mistakes.

We would be grateful if you give us response soon.

Sincerely yours,

Xuexia Wu

The followings are responses to the comments point-by-point.

Review Comments to the Author

*Reviewer #1: In this manuscript entitled ‘Genome-wide analysis of chalcone synthase (CHS) family from eggplant (Solanum melongena L.) in flavonoid biosynthetic pathway and expression pattern in response to heat stress’ the authors have identified CHS-encoding genes of eggplant, performed their in silico characterization and analysed the expression pattern of key genes associated with anthocyanin biosynthesis pathways. Here are the following comments on the research for the authors:*

*1. The manuscript need to be revised for its English, grammar and flow of information. For example in L130: ‘The profiles of CHS (PF00195 and PF02797) were downloaded from the Pfam’- wwere need to be corrected to were. Line 198: ‘the other 7 Solanaceae species ranged from 17.3 to 47.4, the length of protein ranged’ kDa need to be added to the molecular weights mentioned here.*

**Answer:** Thank you for pointing out the mistakes in the manuscript. We have corrected these issues in the revised manuscript according to comments, and checked the manuscript many times. Please refer to line 163 in revised manuscript with track changes.

*2. It would be more informative for the readers if authors will provide a comparative mapping of CHS genes in the genome of other related plants where sequence information are available.*

**Answer:** Chromosomal location of *CHS* genes were added in Table S1. Sequence alignment of all 73 CHS proteins of *Solanum* specie showed in the Fig S1. The VIII, IX

and X groups are distinguished from other groups mainly depends on the position 1-164 amino acids, Groups I, II and III are relatively conservative at the position 260-360 amino acids, in which the other groups are very diverse(S1 Fig). Please refer to line 325-328.

3. *Fig. 7. represents key anthocyanin biosynthesis gene expression profiles in response to heat stress. A bar diagram with proper error bars for individual gene will be the most appropriate way for presentation of this result. The authors are advised to prepare the same for readers convenient.*

**Answer:** Thanks for your suggestion. Error bars have been added in the Fig7.

4. *Authors have performed the phylogenetic classification of CHS gene in Solanaceae and found that 73 CHS genes have classified into 10 groups. However, it has not been mentioned or discussed that on what basis the CHS are classified and how one group differs with the others.*

**Answer:** The results of all 73 CHS proteins sequence alignment were added in S1 Fig. Conserved residues and sequence diversity of 73 CHS proteins were analyzed. Please refer to line 240-244 and 325-328

5. *As authors have mentioned in the text about some of the cis regulatory element present on all the SmCHS promoter, similarly they should mention the unique cis element for each SmCHS genes. Not all CHS genes had shown similar expression pattern, thus a probable correlation of cis regulatory element on promoter and expression pattern of the gene should be mentioned in the discussion.*

**Answer:** I'm sorry we miss the point. We have added this to the 'result' section refer to line 303-307.

*Reviewer #2: The manuscript entitled "Genome-wide analysis of chalcone synthase (CHS) family from eggplant (Solanum melongena L.) in flavonoid biosynthetic pathway and expression pattern in response to heat stress" by Wu et al. reports the in silico analysis of chalcone synthase (CHS) gene family in eggplant. In brief, the current manuscript presents biochemical characteristics, phylogenetic relationships, gene structures, cis-regulatory elements, regulatory network and functional predictions of the CHS gene family members.*

*The current quality of the manuscript leaves a number of questions to be answered, which are outlined below. The exposition of the results and its discussion in the manuscript needs a major revision including careful English usage and style edition.*

1. *The manuscript title starts with 'Genome-wide analysis'; however, most of the analysis has been performed on CHS proteins. The work performed in the manuscript does not justify the title.*

**Answer:** We changed the manuscript title as to 'Chalcone synthase (CHS) family members analysis from eggplant (*Solanum melongena* L.) in the flavonoid biosynthetic pathway and expression patterns in response to heat stress'.

2. The 'Introduction' section of the manuscript is not coherent. Also, it does not describe the relevance of studying CHS gene family in proper manner.

**Answer:** We have added more information about CHS involve in synthesis of flavonoid compounds during heat stress defense. Please refer to line 70-80.

3. One of the major concerns is, authors have given RNA-Seq data in the result section. However, the source of this data is not described in the "Material and Method" section.

**Answer:** The overview of RNA-seq result from our lab was published (Zhang S et al, BMC Plant Biol. 2019 (1): 1-13). We therefore added a brief description of data source about RNA-seq in the "Material and Method" section. Please refer to line 196-198.

4. Also, authors have not provided the proper statistics of the validation experiment. Statistical analysis should be done to evaluate the significance of qRT-PCR data. It is recommended to include statistical analysis in the 'Materials and methods' section.

**Answer:** we have added the statistical analysis information of qRT-PCR in the 'Materials and methods' section. Please refer to line 223-225.

5. Writing in Subheadings 4 to 7 under the 'Results' section is very technical. The data is not described properly. Authors have chosen to explain the dataset in the 'Discussion' section. The outcome of the experiments should be described in the 'Results' section and interpretation in consistence with the previous studies should be given in the 'Discussion' section.

**Answer:** We agree and have revised the 'results' and 'discussion' accordingly. Please refer to line 351-361.

6. In Figure 3A, the abundance of cis-elements is given in all the CHS genes in eggplant. How the regulation of all the genes can be shown together?

**Answer:** We changed the histogram of figure 3A into a table to help readers understand the results.

7. In Figure 5, there is no downregulation value. How the data has been calculated? What control has been taken and how the data has been normalized?

**Answer:** Some errors have been corrected in line 351 of manuscript. Three *SmCHS* genes (*SmCHS1*, *SmCHS2*, and *SmCHS3*) were continuously downregulated under 38 °C and 45 °C treatment compared with the CK (27 °C). Gene expression level was estimated by RNA-seq from mean FPKM (fragments per kilobase of exon model per million reads mapped) values for each treatment, and showed the expression patterns in heatmap. Each treatment had three biological replicates.

8. Figure 6, network is not very clear. A clear image has to be provided.

**Answer:** Is the network image you referred to Figure S2? We're sorry that there are too many genes in the network image. The picture can be expanded up to 6400%, so that the above words can be read clearly.

9. In 'Material and Method' section, what is CK? Why the samples harvested at 28° C are termed as CK and all the subsequent data is compared to CK?

**Answer:** The optimum growth temperature for eggplant is between 22 and 30°C. Eggplants subjected to high temperature may exhibit to stagnation of growth, abortion of flower buds, and decrease of pollen viability rate and fruit set, and the peel's color will turn light when the temperature is over 35°C. Therefore, samples of 27 °C were termed as CK.

10. In Figure 7, all the genes are showing high expression at 3 h CK. Do authors have any explanation of these results? Also, this data has been recorded from which tissue?

**Answer:** Under heat stress, SmCHS4 and some anthocyanin biosynthesis related genes show different expression profiles at 38 °C-3h. These results suggest that these co-up-regulated genes contribute to protect the eggplant at beginning of heat stress defense. These data were recorded from the eggplant peels, which is indicated in the Figure 5 and Figure 6.

11. The other major issue is that this manuscript requires a thorough language editing since there are numerous grammatical errors including dropped articles, split infinitives, improper word usage etc. It is advisable that the manuscript must be edited by an English-speaking personal.

**Answer:** We checked and revised the manuscript many times. Some grammatical errors and words spelling mistakes have been modified by English editing company of American Journal Experts (AJE).

12. Reference section has to be rechecked. For example, in few places journal name is abbreviated (*J Exp Bot*) and in few places it is not (*Plant physiology*). In few references, journal name is capitalized and in others it is not.

**Answer:** This issue has been corrected.

13. Biochemical analysis of CHS proteins (pI, molecular weight etc.) is not relevant to the manuscript. This data can be removed from the draft.

Overall, the manuscript is not of adequate quality. The manuscript should be revised thoroughly for data presentation, result interpretation, description and language.

**Answer:** Biochemical analysis of CHS proteins was removed.
